# Supplementary material for: Synthesis of N-fused dithia and dibenzi homoporphyrins
Source: Royal Society of Chemistry journal article supplement (doi:10.1039/d1qo01946e), 2022-01-01
Supplement: d1qo01946e1.pdf [file d1qo01946e1.pdf]

## Supporting Information

### Synthesis of N-Fused Dithia and Dibenzi Homoporphyrins

Rima Sengupta, Prosenjit Isar and Mangalampalli Ravikanth\*

Department of Chemistry, Indian Institute of Technology Bombay, Powai, Mumbai 400076,  
India, E-mail: [ravikanth@chem.iitb.ac.in](mailto:ravikanth@chem.iitb.ac.in)

| Sr. no | Details                                                                                                              | Page no. |
|--------|----------------------------------------------------------------------------------------------------------------------|----------|
| 1      | <b>Experimental Section</b>                                                                                          | S2-S7    |
| 2      | <b>Figures S1-S20.</b> Characterization (HRMS and NMR) data for all new compounds                                    | S8-S27   |
| 3      | <b>Figure S21.</b> Absorption spectra for compounds <b>3-7</b> with and without TFA                                  | S28      |
| 4      | <b>Tables S2-S4.</b> X-ray crystal data for the compound <b>6</b>                                                    | S29-S32  |
| 5      | <b>Figure S22.</b> DFT optimized structure of <b>6</b>                                                               | S33      |
| 6      | <b>Tables S5-S6.</b> Cartesian coordinates of the optimized (S0) geometries of the compounds <b>3</b> and <b>6</b> . | S34-S36  |
| 7      | <b>Table S7.</b> Absorption data of compounds <b>3-7</b>                                                             | S37      |
| 8      | <b>References</b>                                                                                                    | S37-S38  |

## Experimental Section

**General Experimental:** The chemicals such as  $\text{BF}_3 \cdot \text{OEt}_2$ , 2,3-dichloro-5,6-dicyano-1,4-benzoquinone (DDQ) were obtained from Aldrich. All other chemicals used for the synthesis were reagent grade unless and otherwise specified. Column chromatography was performed on silica gel and basic alumina. The  $^1\text{H}$ , and  $^{13}\text{C}$  NMR spectra were recorded in  $\text{CDCl}_3$  on Bruker 400 and 500 MHz instruments. The frequencies for  $^{13}\text{C}$  nucleus are 100.06 and 125.77 MHz for 400 MHz and 500 MHz instruments respectively. Tetramethylsilane [ $\text{Si}(\text{CH}_3)_4$ ] was used as an internal standard for  $^1\text{H}$  and  $^{13}\text{C}$  NMR. Absorption spectra were obtained with Shimadzu UV-Vis-NIR Spectrophotometer. X-ray Crystal Structure Analysis. Single-crystal X-ray structure analysis was performed on a Bruker D8 Quest that was equipped with a low-temperature attachment. Data were collected at 293 K using graphite-monochromated  $\text{Cu K}\alpha$  radiation ( $\lambda = 1.54184 \text{ \AA}$ ) by  $\omega$ -scan technique. The data were reduced by using CrysAlisPro 1.171.38.43 software. The structures were solved by direct methods and refined by least-squares against  $F^2$  utilizing the software packages SHELXL-2018/3 in Olex2 1.2. All non-hydrogen atoms were refined anisotropically. An empirical absorption correction by multiscans was applied, and all of the non-hydrogen atoms were refined with anisotropic displacement factors. The hydrogen atoms were placed in ideal positions and fixed with relative isotropic displacement parameters. The solvent molecules that could not be identified or modeled were found and eventually squeezed using the function squeeze in Olex2. The corresponding loop of the residual electron-voids (from Olex2) was appended in the corresponding cif file. CCDC No. 2078340 (for compound **6**) contains the supplementary crystallographic data for this paper. These data can be obtained free of charge from The Cambridge Crystallographic Data Centre via [www.ccdc.cam.ac.uk/data\\_request/cif](http://www.ccdc.cam.ac.uk/data_request/cif). IR spectra were recorded with a Nicolet Impact-400 FTIR

spectrometer with KBr plates and analyzed.

**Computational Information.** A Gaussian 09 program package was used for performing all the calculations. The optimized structures of compound **3** and **6** in ground (S<sub>0</sub>) states were generated using the density functional theory (DFT)<sup>1</sup> technique, hybrid functional B3LYP with basis set 6-31G(d,p).<sup>2</sup> Identical basis and functional hybrid set were used to obtain the oscillator strengths, and vertical excitation energies were obtained for S<sub>0</sub>→S<sub>n</sub> transitions by the help of TD-DFT techniques.<sup>3-7</sup> By making use of the self-consistent reaction field (SCRF), several computations were performed in toluene under the polarizable continuum model (PCM).<sup>8,9</sup>

#### **General procedure for synthesis of N-fused dibenzi homoporphyrins 3-7:**

The dithienyl diol **8**, *p*-phenylene diol **9** and N-confused dipyrromethane **10** were synthesized by the reported methods. Samples of appropriate diol **8/9** (0.60 mmol, 1 eqv) and appropriate N-confused dipyrromethane **10** (0.60 mmol, 1 eqv) were dissolved in 200 mL CH<sub>2</sub>Cl<sub>2</sub> and purged N<sub>2</sub> gas for 15 mins. BF<sub>3</sub>.OEt<sub>2</sub> (0.18 mmol, 0.3 eqv) was added to initiate the reaction and stirred the reaction mixture under nitrogen for 30 mins. DDQ (1.5 mmol, 2.5 eqv) was added to the solution and continued stirring in open air for another 30 mins. The reaction mixture was concentrated on a rotary evaporator under reduced pressure and the crude compound was purified by neutral alumina column chromatography using petroleum ether/dichloromethane as eluent and afforded the desired N-fused homoporphyrins **3-7** in 3-10 % yields as dark red/green solids.

**Table S1.** Reaction conditions used for the synthesis of N-fused homoporphyrin 6.

| Acid (Equivalent)                       | Solvent | Oxidant (Equivalent)      | Yield (%) |
|-----------------------------------------|---------|---------------------------|-----------|
| BF <sub>3</sub> .OEt <sub>2</sub> (0.1) | 200 mL  | DDQ (1.5)                 | 0.5       |
| BF <sub>3</sub> .OEt <sub>2</sub> (0.1) | 200 mL  | DDQ (2.5)                 | 1         |
| BF <sub>3</sub> .OEt <sub>2</sub> (0.3) | 200 mL  | DDQ (1.5)                 | 1         |
| BF <sub>3</sub> .OEt <sub>2</sub> (0.3) | 200 mL  | DDQ (2.5)                 | 3         |
| BF <sub>3</sub> .OEt <sub>2</sub> (0.3) | 50 mL   | DDQ (2.5)                 | 2         |
| BF <sub>3</sub> .OEt <sub>2</sub> (1)   | 200 mL  | DDQ (1.5)                 | 0.6       |
| BF <sub>3</sub> .OEt <sub>2</sub> (1)   | 200 mL  | DDQ (2.5)                 | 1.2       |
| BF <sub>3</sub> .OEt <sub>2</sub> (1)   | 50 mL   | DDQ (2.5)                 | 1.2       |
| BF <sub>3</sub> .OEt <sub>2</sub> (0.3) | 200 mL  | <i>p</i> -Chloranil (2.5) | 1         |
| BF <sub>3</sub> .OEt <sub>2</sub> (0.3) | 200 mL  | <i>p</i> -Chloranil (3.5) | 1         |
| TFA (0.5)                               | 200 mL  | DDQ (2.5)                 | X         |
| TFA (1)                                 | 200 mL  | DDQ (2.5)                 | X         |
| TFA (0.5)                               | 50 mL   | DDQ (2.5)                 | X         |

**Synthesis of compound 3a:**

Purified by basic alumina column chromatography using petroleum ether/CH<sub>2</sub>Cl<sub>2</sub> (80:20), 10% yield (41.22 mg); red colored crystalline solid; R<sub>f</sub> = 0.7; mp. >300° C; <sup>1</sup>H NMR (500 MHz, CDCl<sub>3</sub>), δ 7.38 (d, J = 8.4 Hz, 2H, Ar), 7.34 (d, J = 7.9 Hz, 2H, Ar), 7.22 (d, J = 3.1 Hz, 3H, Ar, Thiophene-H), 7.14 (d, J = 7.8 Hz, 2H, Ar), 7.05 (d, J = 3.3 Hz, 1H, Thiophene-H), 6.95 (d, J = 8.4 Hz, 2H, Ar), 6.86 (d, J = 8.5 Hz, 2H, Ar), 6.79 (d, J = 3.9 Hz, 1H, Pyrrole-H), 6.65 (dd, J = 10.1, 4.8 Hz, 2H, Pyrrole-H, Thiophene-H), 6.51 (d, J = 5.7 Hz, 1H, Thiophene-H), 6.34 (s, 1H, Pyrrole-H), 3.88 (s, 3H, OCH<sub>3</sub>), 3.84 (s, 3H, OCH<sub>3</sub>), 2.34 (s, 3H, Tolylyl-CH<sub>3</sub>), 2.16 (s, 6H, Ethene-CH<sub>3</sub>). <sup>13</sup>C{<sup>1</sup>H} NMR (101 MHz, CDCl<sub>3</sub>) δ 164.1, 160.2, 159.6, 156.5, 154.4, 154.0, 150.5, 146.4, 143.1, 141.3, 140.7, 136.4, 136.0, 135.7, 134.3, 132.9, 132.4, 130.9, 130.8, 130.2, 130.1, 129.4, 127.7, 127.5, 127.1, 125.7, 123.9, 120.7, 119.4, 119.1, 113.3, 109.4, 55.3, 55.2, 23.0, 21.2, 17.9. IR (KBr) 3434, 2923, 2852, 1601, 1507, 1461, 1401, 1364, 1247, 1174, 1123, 1031, 835, 732, 689 cm<sup>-1</sup>. HRMS (ESI-TOF) calcd. for C<sub>44</sub>H<sub>35</sub>N<sub>2</sub>O<sub>2</sub>S<sub>2</sub> (M+H)<sup>+</sup> 687.2134; found 687.2133.

**Synthesis of compound 3b:**

Purified by basic alumina column chromatography using petroleum ether/CH<sub>2</sub>Cl<sub>2</sub> (80:20), 10% yield (40.38 mg); red colored crystalline solid; R<sub>f</sub> = 0.7; mp. >300° C; <sup>1</sup>H NMR (500 MHz, CDCl<sub>3</sub>) δ 7.44 (d, J = 7.5 Hz, 2H, Ar), 7.39 (d, J = 8.6 Hz, 2H, Ar), 7.33 (t, J = 7.7 Hz, 2H, Ar), 7.25 – 7.15 (m, 4H, Ar, Thiophene-H), 7.06 (d, J = 3.5 Hz, 1H, Thiophene-H), 6.95 (d, J = 8.6 Hz, 2H, Ar), 6.86 (d, J = 8.8 Hz, 2H, Ar), 6.79 (d, J = 4.0 Hz, 1H, Pyrrole-H), 6.68 (d, J = 5.7 Hz, 1H, Thiophene-H), 6.64 (d, J = 4.0 Hz, 1H, Pyrrole-H), 6.53 (d, J = 5.7 Hz, 1H, Thiophene-H), 6.36 (s, 1H, Pyrrole-H), 3.88 (s, 3H, Anisyl-CH<sub>3</sub>), 3.84 (s, 3H, Anisyl-CH<sub>3</sub>), 2.16 (s, 6H, Ethene-CH<sub>3</sub>). <sup>13</sup>C NMR (101 MHz, CDCl<sub>3</sub>) δ 164.3, 160.5, 159.9, 156.7, 155.1, 154.3, 150.9, 146.6, 143.4, 141.8, 140.8, 137.0, 136.0, 134.5, 134.0, 133.2, 132.7, 131.22, 130.64, 130.3, 129.0, 128.0, 127.8, 127.4, 126.3, 126.1, 124.2, 120.9, 119.9, 119.7, 181.8 – 6.3, 113.7, 113.6, 109.6, 55.6, 55.5, 30.0, 23.3. IR (KBr) 3434, 2930, 2850, 1601, 1503, 1465, 1401, 1362, 1247, 1172, 1123, 1031, 835, 732, 689 cm<sup>-1</sup>. HRMS (ESI-TOF) calcd. for C<sub>43</sub>H<sub>33</sub>N<sub>2</sub>O<sub>2</sub>S<sub>2</sub> (M+H)<sup>+</sup> 673.1978; found 673.1977.

**Synthesis of compound 4:**

Purified by neutral alumina column chromatography using petroleum ether/CH<sub>2</sub>Cl<sub>2</sub> (80:20), 4% yield (15.40 mg); green colored crystalline solid; R<sub>f</sub> = 0.5; mp. >300° C; <sup>1</sup>H NMR (500 MHz, CDCl<sub>3</sub>) δ 7.42 (d, J = 7.8 Hz, 2H, Ar), 7.38 (d, J = 7.8 Hz, 2H, Ar), 7.23 (d, J = 7.8 Hz, 2H, Ar), 7.17 (d, J = 4.3 Hz, 4H, Ar), 7.13 – 7.08 (m, 4H, Ar), 7.04 (d, J = 7.8 Hz, 2H, Ar), 6.97 (d, J = 7.8 Hz, 2H, Ar), 6.73 (s, 1H, Pyrrole), 6.65 (d, J = 8.0 Hz, 2H, Ar), 6.58 (d, J = 5.7 Hz, 1H, Pyrrole), 6.41 (d, J = 5.8 Hz, 1H, Pyrrole), 2.42 (s, 3H, Toly-CH<sub>3</sub>), 2.36 (d, J = 3.2 Hz, 6H, Toly-CH<sub>3</sub>), 2.24 (s, 3H, Ethene-CH<sub>3</sub>), 2.08 (s, 3H, Ethene-CH<sub>3</sub>). <sup>13</sup>C{<sup>1</sup>H} NMR (126 MHz,

CDCl<sub>3</sub>)  $\delta$  167.2, 159.7, 156.7, 149.0, 145.2, 144.8, 142.5, 141.7, 139.9, 139.6, 139.3, 137.4, 136.7, 136.5, 136.3, 135.4, 134.5, 133.7, 132.7, 132.0, 131.5, 131.1, 129.8, 129.1, 128.9, 127.9, 127.7, 126.2, 124.6, 119.4, 118.0, 107.5, 23.0, 21.6, 21.5, 20.1, 18.9. IR (KBr) 3474, 3393, 2954, 2924, 2853, 1602, 1508, 1456, 1408, 1361, 1249, 1176, 1159, 1016, 829, 815, 798, 573 cm<sup>-1</sup>. HRMS (ESI-TOF) calcd. for C<sub>48</sub>H<sub>38</sub>N<sub>2</sub> (M+H)<sup>+</sup> 643.3108; found 643.3107.

### Synthesis of compound 5:

Purified by neutral alumina column chromatography using petroleum ether/CH<sub>2</sub>Cl<sub>2</sub> (80:20), 6% yield (22.60 mg); green colored crystalline solid; R<sub>f</sub> = 0.5; mp. >300° C; <sup>1</sup>H NMR (400 MHz, CDCl<sub>3</sub>)  $\delta$  7.49 (d, J = 7.1 Hz, 2H, Ar), 7.43 (d, J = 7.3 Hz, 2H, Ar), 7.39 – 7.33 (m, 2H, Ar), 7.17-7.23 (m, 5H, Ar), 7.15 – 7.09 (m, 4H, Ar), 7.04 (d, J = 7.2 Hz, 2H, Ar), 6.97 (d, J = 7.3 Hz, 2H, Ar), 6.76 (s, 1H, Pyrrole-H), 6.66 (d, J = 7.7 Hz, 2H, Ar), 6.61 (d, J = 5.6 Hz, 1H, Pyrrole-H), 6.44 (d, J = 5.3 Hz, 1H, Pyrrole-H), 2.43 (s, 3H, Tolylyl-CH<sub>3</sub>), 2.37 (s, 3H, Tolylyl-CH<sub>3</sub>), 2.24 (s, 3H, Ethene-CH<sub>3</sub>), 2.08 (s, 3H, Ethene-CH<sub>3</sub>). <sup>13</sup>C{<sup>1</sup>H} NMR (101 MHz, CDCl<sub>3</sub>)  $\delta$  145.3, 144.9, 142.3, 142.0, 139.9, 139.9, 139.3, 137.8, 137.0, 136.5, 135.4, 134.7, 134.1, 133.7, 132.7, 132.0, 131.6, 129.1, 129.2, 128.9, 127.9, 127.8, 126.5, 126.2, 119.4, 118.0, 107.4, 30.0, 21.7, 20.1, 18.9. IR (KBr) 3440, 2925, 2849, 1607, 1510, 1465, 1400, 1359, 1245, 1165, 1119, 1026, 842, 755, 602 cm<sup>-1</sup>. HRMS (ESI-TOF) calcd. for C<sub>47</sub>H<sub>36</sub>N<sub>2</sub> (M+H)<sup>+</sup> 629.2951; found 629.2958.

### Synthesis of compound 6:

Purified by neutral alumina column chromatography using petroleum ether/CH<sub>2</sub>Cl<sub>2</sub> (60:40), 3% yield (12.13 mg); green colored crystalline solid; R<sub>f</sub> = 0.8; mp. >300° C; <sup>1</sup>H NMR (500 MHz, CDCl<sub>3</sub>)  $\delta$  7.47 (d, J = 7.5 Hz, 2H, Ar), 7.39 (d, J = 7.3 Hz, 2H, Ar), 7.18 (d, J = 5.4 Hz, 4H, Ar),

7.12 (d,  $J = 7.1$  Hz, 2H, Ar), 7.06 (d,  $J = 7.5$  Hz, 2H, Ar), 7.01 – 6.92 (m, 4H, Ar), 6.83 (d,  $J = 7.3$  Hz, 2H, Ar), 6.73 (s, 1H, Pyrrole-H), 6.66 (d,  $J = 7.2$  Hz, 2H, Ar), 6.59 (d,  $J = 4.7$  Hz, 1H, Pyrrole-H), 6.41 (d,  $J = 4.7$  Hz, 1H, Pyrrole-H), 3.87 (s, 3H, OCH<sub>3</sub>), 3.83 (s, 3H, OCH<sub>3</sub>), 2.36 (s, 3H, Toly-CH<sub>3</sub>), 2.24 (s, 3H, Ethene-CH<sub>3</sub>), 2.08 (s, 3H, Ethene-CH<sub>3</sub>). <sup>13</sup>C{<sup>1</sup>H} NMR (101 MHz, CDCl<sub>3</sub>)  $\delta$  160.3, 158.8, 156.1, 141.8, 139.3, 136.5, 136.1, 135.8, 134.9, 134.0, 133.8, 133.2, 133.0, 132.7, 132.4, 131.6, 131.2, 130.7, 129.4, 129.3, 129.2, 127.9, 127.5, 126.7, 125.7, 123.9, 113.5, 113.4, 113.1, 112.1, 106.8, 63.2, 53.4, 52.8, 52.2, 45.8. IR (KBr) 3432, 2930, 2848, 1605, 1505, 1455, 1395, 1352, 1234, 1162, 1123, 1023, 830, 762, 633 cm<sup>-1</sup>. HRMS (ESI-TOF) calcd. for C<sub>48</sub>H<sub>38</sub>N<sub>2</sub>O<sub>2</sub> (M+H)<sup>+</sup> 675.3006; found 675.3001.

#### Synthesis of compound 7:

Purified by neutral alumina column chromatography using petroleum ether/CH<sub>2</sub>Cl<sub>2</sub> (60:40), 5% yield (19.80 mg); green colored crystalline solid;  $R_f = 0.8$ ; mp. >300° C; <sup>1</sup>H NMR (400 MHz, CDCl<sub>3</sub>)  $\delta$  7.49 (t,  $J = 8.6$  Hz, 4H, Ar), 7.37 (t,  $J = 7.7$  Hz, 2H, Ar), 7.19 (d,  $J = 8.0$  Hz, 3H, Ar), 7.13 (d,  $J = 8.2$  Hz, 2H, Ar), 7.07 (d,  $J = 8.6$  Hz, 2H, Ar), 6.97 (t,  $J = 8.8$  Hz, 4H, Ar), 6.83 (d,  $J = 8.6$  Hz, 2H, Ar), 6.76 (s, 1H, Pyrrole-H), 6.66 (d,  $J = 8.2$  Hz, 2H, Ar), 6.61 (d,  $J = 5.9$  Hz, 1H, Pyrrole-H), 6.43 (d,  $J = 5.8$  Hz, 1H, Pyrrole-H), 3.88 (s, 3H, OCH<sub>3</sub>), 3.83 (s, 3H, OCH<sub>3</sub>), 2.24 (s, 3H, Ethene-CH<sub>3</sub>), 2.09 (s, 3H, Ethene-CH<sub>3</sub>). <sup>13</sup>C{<sup>1</sup>H} NMR (101 MHz, CDCl<sub>3</sub>)  $\delta$  166.6, 160.4, 159.0, 158.8, 156.6, 148.7, 144.9, 144.6, 142.1, 139.8, 137.0, 136.5, 135.4, 134.5, 134.3, 134.1, 133.7, 133.3, 132.8, 132.1, 131.6, 129.1, 127.9, 127.8, 126.3, 126.2, 124.8, 119.3, 117.7, 113.9, 113.2, 106.9, 55.4, 55.2, 22.7, 19.8, 18.6. IR (KBr) 3485, 3390, 2952, 2930, 2850, 1615, 1505, 1454, 1420, 1357, 1245, 1165, 1154, 1009, 825, 795, 571 cm<sup>-1</sup>. HRMS (ESI-TOF) calcd. for C<sub>47</sub>H<sub>36</sub>N<sub>2</sub>O<sub>2</sub> (M+H)<sup>+</sup> 661.2850; found 661.2848.

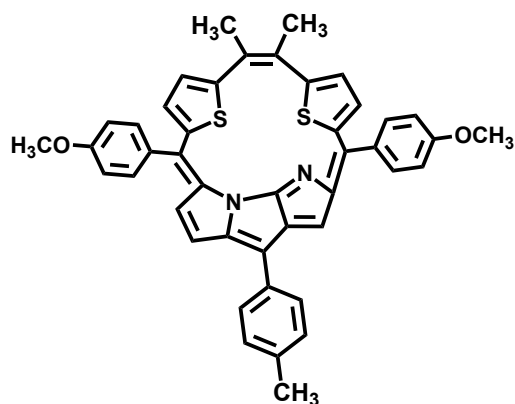

Compound 3a

## DEPARTMENT OF CHEMISTRY, I.I.T.(B)

## Analysis Info

Analysis Name D:\Data\AUG 2021\MR-RS-ANI-11.d  
 Method NaICSI\_pos\_1000.m  
 Sample Name MR-RS-ANI-11  
 Comment C44H34N2O2S2

Acquisition Date 8/12/2021 6:36:43 PM

Operator MSB-OUT  
 Instrument maXis impact 282001.00081

## Acquisition Parameter

|             |            |                      |          |                  |           |
|-------------|------------|----------------------|----------|------------------|-----------|
| Source Type | ESI        | Ion Polarity         | Positive | Set Nebulizer    | 0.3 Bar   |
| Focus       | Not active | Set Capillary        | 3800 V   | Set Dry Heater   | 180 °C    |
| Scan Begin  | 50 m/z     | Set End Plate Offset | -500 V   | Set Dry Gas      | 4.0 l/min |
| Scan End    | 1000 m/z   | Set Charging Voltage | 2000 V   | Set Divert Valve | Source    |
|             |            | Set Corona           | 0 nA     | Set APCI Heater  | 0 °C      |

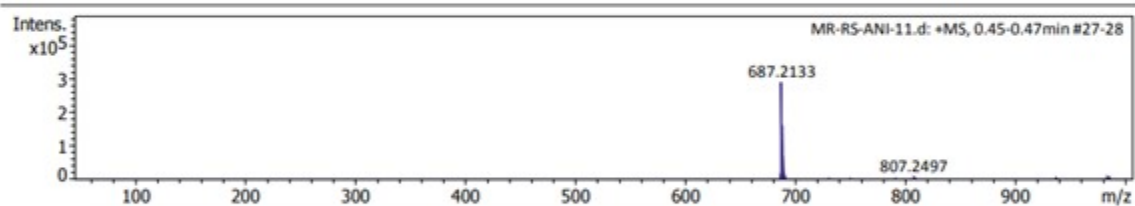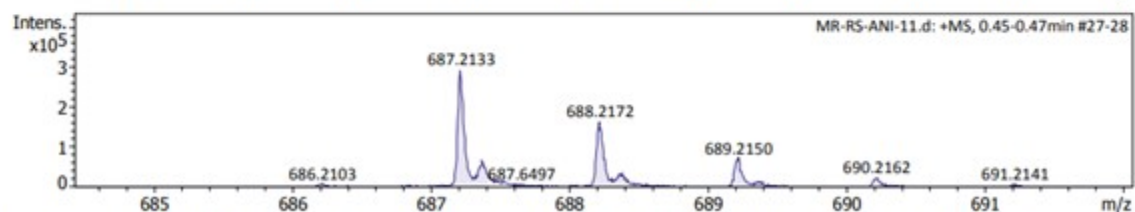

| Meas. m/z | # | Ion Formula  | m/z      | err [ppm] | mSigma | # mSigma | Score  | rdb  | e <sup>-</sup> Conf | N-Rule |
|-----------|---|--------------|----------|-----------|--------|----------|--------|------|---------------------|--------|
| 687.2133  | 1 | C44H35N2O2S2 | 687.2134 | 0.3       | 28.3   | 1        | 100.00 | 33.0 | even                | ok     |

Figure S1. HR mass spectrum of the compound 3a.



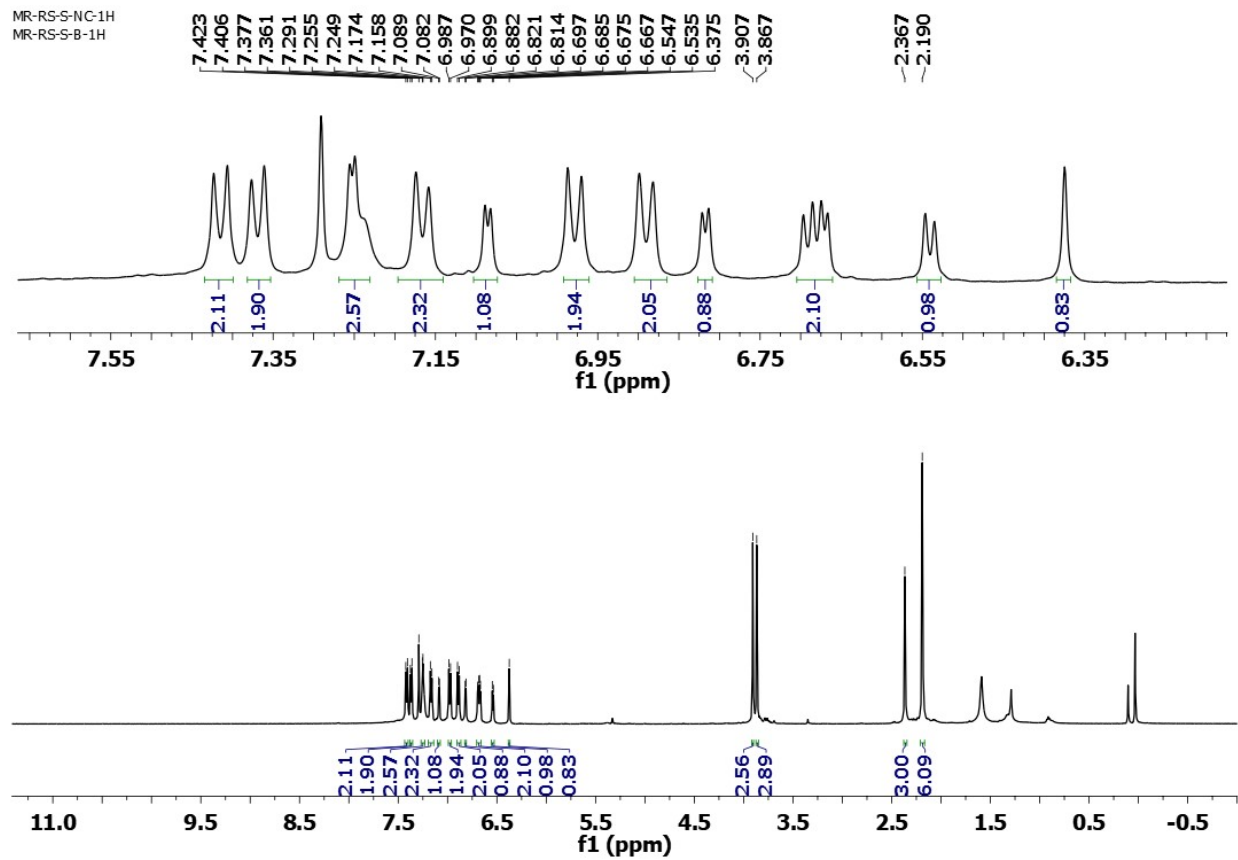

Figure S2.  $^1\text{H}$  NMR spectrum of the compound **3a** recorded in  $\text{CDCl}_3$  in 500 MHz.

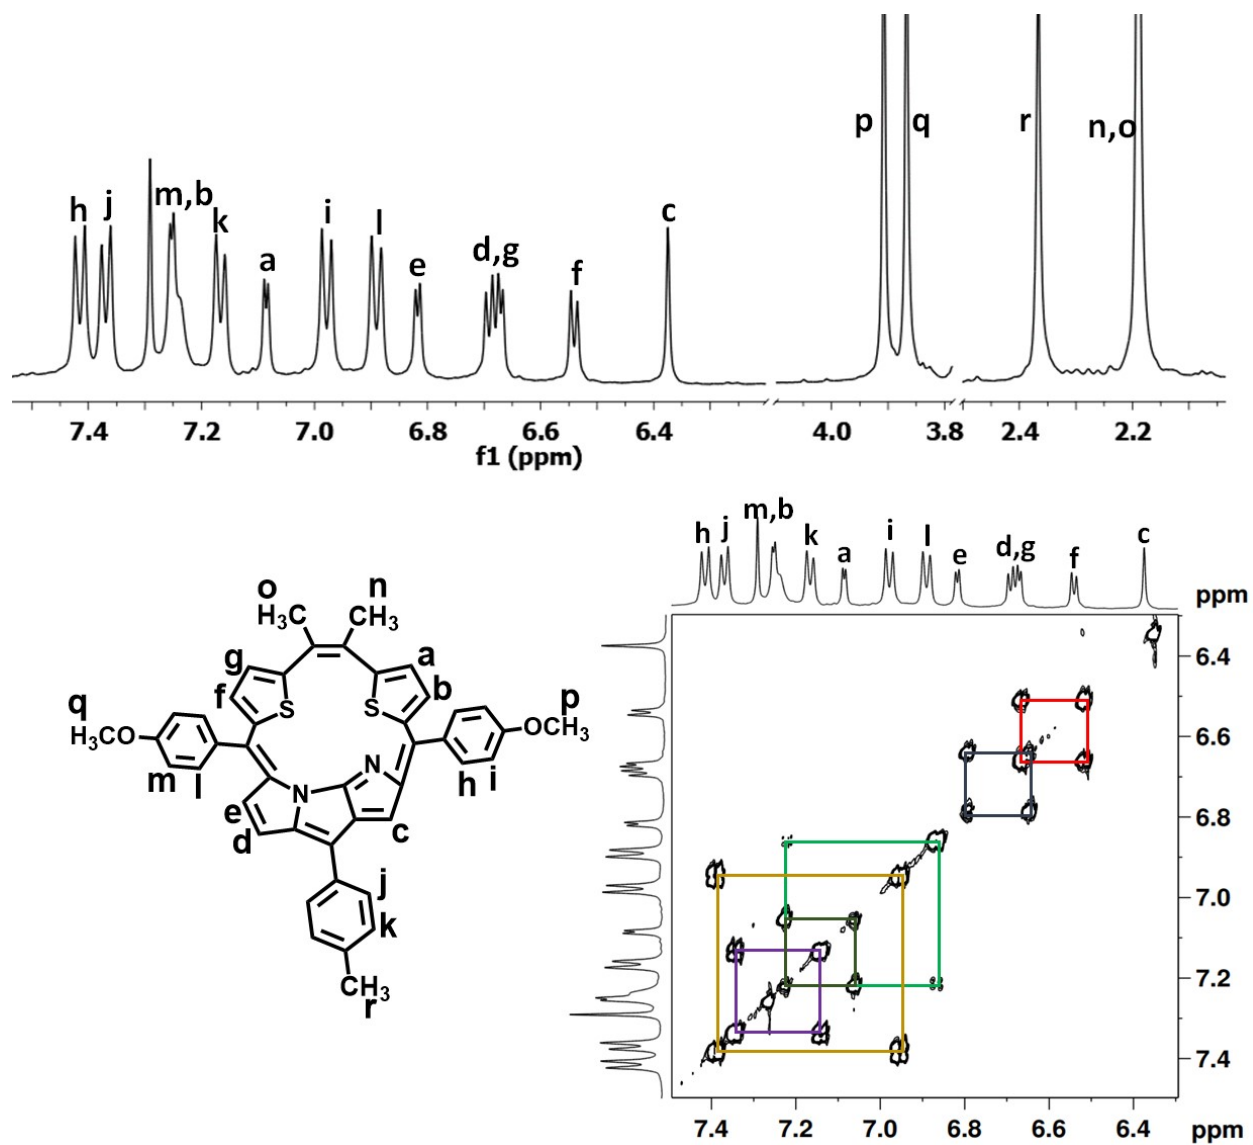

**Figure S3.**  $^1\text{H}$ - $^1\text{H}$  COSY spectrum of the compound **3a** recorded in  $\text{CDCl}_3$  in 500 MHz.

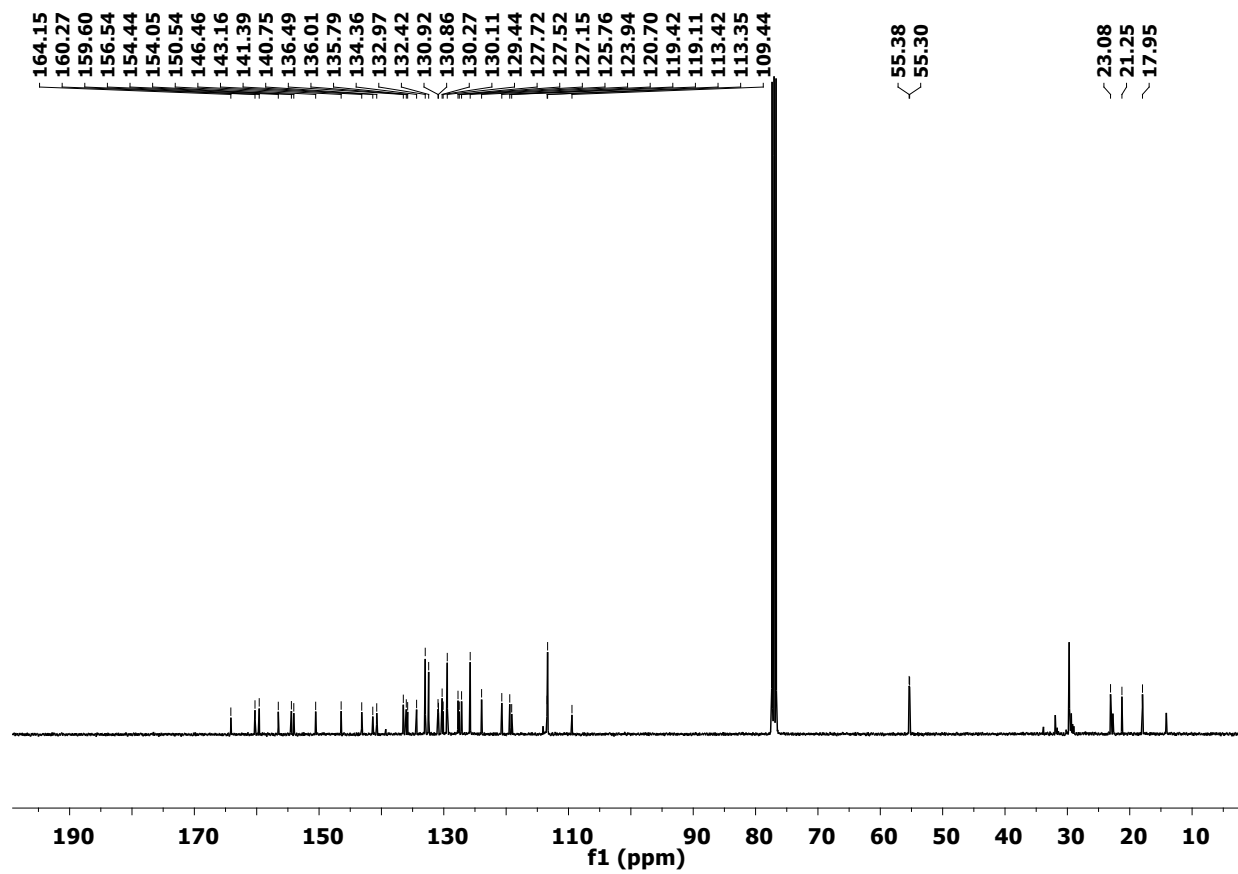

Figure S4.  $^{13}\text{C}\{^1\text{H}\}$  NMR spectrum of the compound **3a** recorded in  $\text{CDCl}_3$  in 101 MHz.

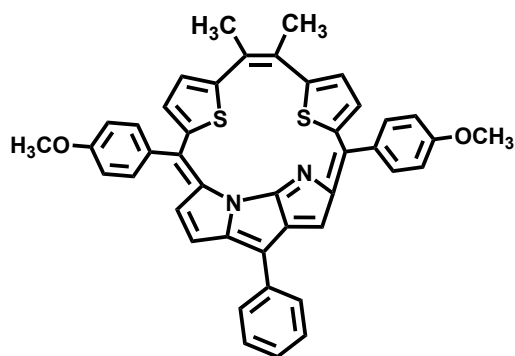Compound **3b**

## DEPARTMENT OF CHEMISTRY, I.I.T.(B)

**Analysis Info**

Analysis Name D:\Data\JAN-2022\MR-RS-PH.d  
 Method NaICSI\_pos\_1000-a.m  
 Sample Name MR-RS-PH  
 Comment C43H32N2O2S2

Acquisition Date 1/21/2022 3:43:21 PM

Operator SJG-IN  
 Instrument maXis impact 282001.00081

**Acquisition Parameter**

|             |            |                      |          |                  |           |
|-------------|------------|----------------------|----------|------------------|-----------|
| Source Type | ESI        | Ion Polarity         | Positive | Set Nebulizer    | 0.3 Bar   |
| Focus       | Not active | Set Capillary        | 3700 V   | Set Dry Heater   | 180 °C    |
| Scan Begin  | 50 m/z     | Set End Plate Offset | -500 V   | Set Dry Gas      | 4.0 l/min |
| Scan End    | 1000 m/z   | Set Charging Voltage | 2000 V   | Set Divert Valve | Source    |
|             |            | Set Corona           | 0 nA     | Set APCI Heater  | 0 °C      |

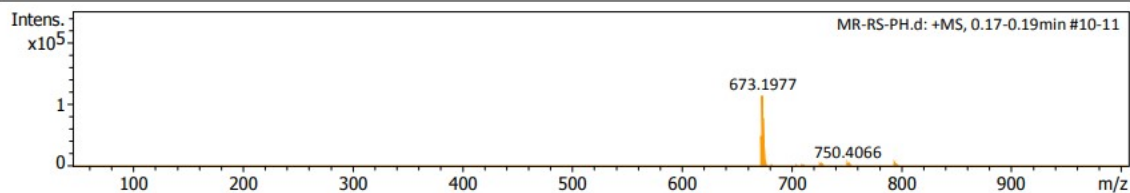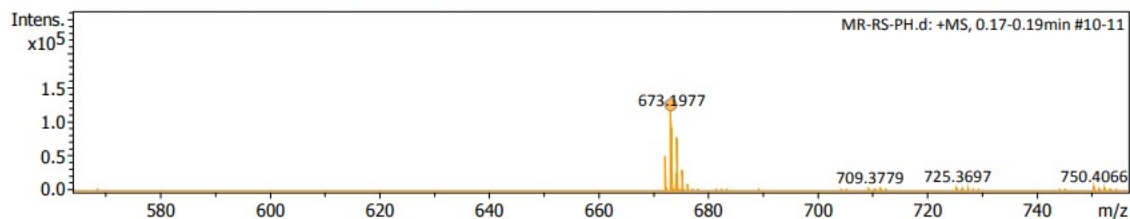

| Meas. m/z | # | Ion Formula  | m/z      | err [ppm] | mSigma | # mSigma | Score  | rdb  | e <sup>-</sup> Conf | N-Rule |
|-----------|---|--------------|----------|-----------|--------|----------|--------|------|---------------------|--------|
| 673.1977  | 1 | C43H33N2O2S2 | 673.1978 | 0.1       | 85.1   | 1        | 100.00 | 33.0 | even                | ok     |

Figure S5. HR mass spectrum of the compound **3b**.

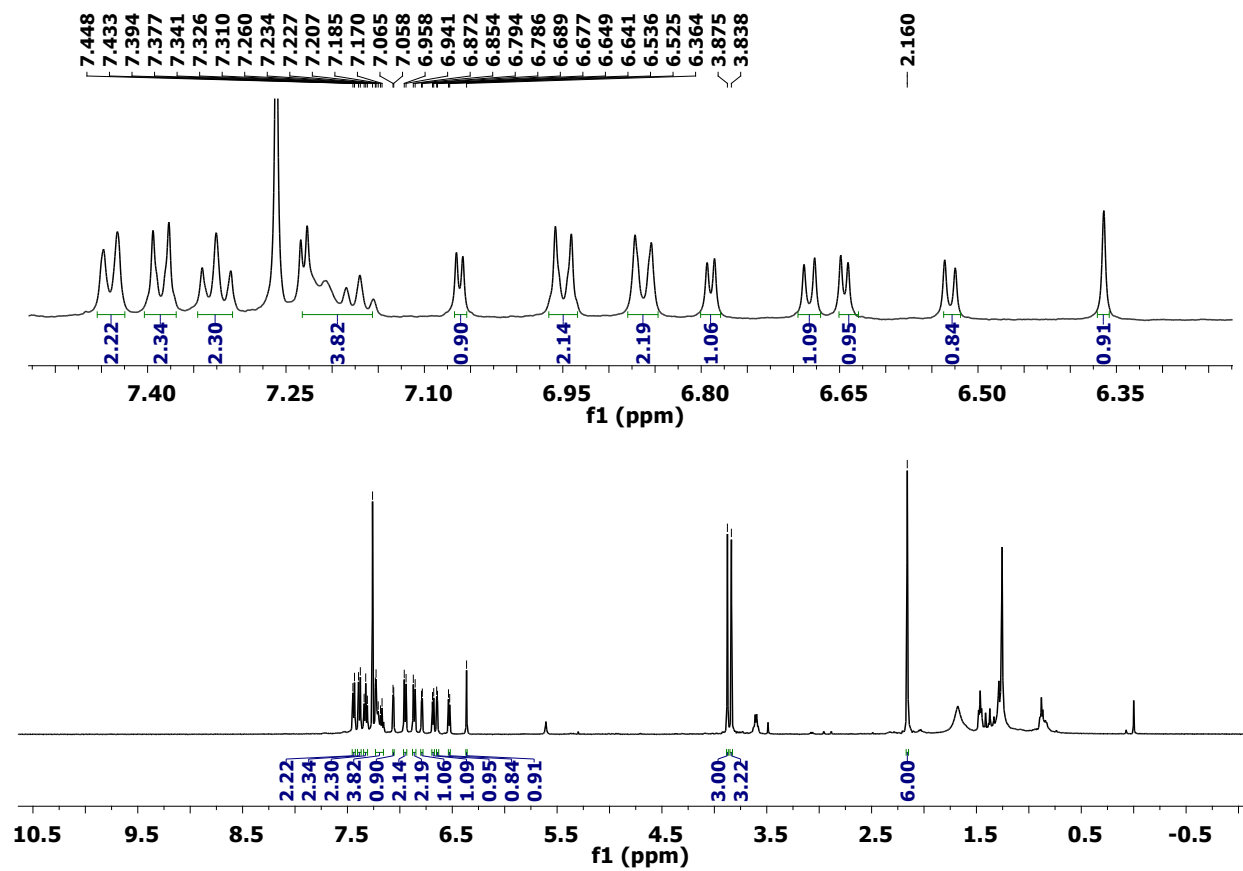

Figure S6.  $^1\text{H}$ NMR spectrum of the compound **3b** recorded in  $\text{CDCl}_3$  in 500 MHz.

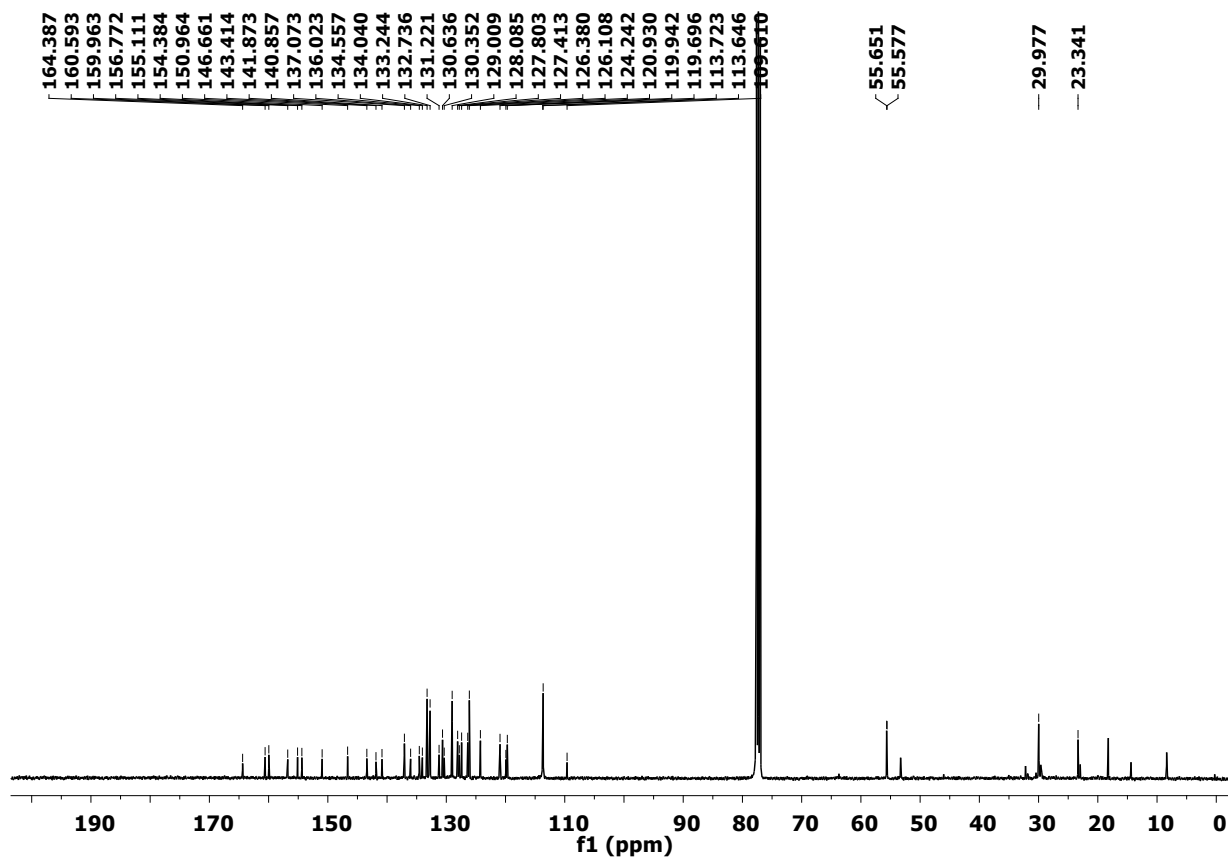

Figure S7.  $^{13}\text{C}\{^1\text{H}\}$  NMR spectrum of the compound **3b** recorded in  $\text{CDCl}_3$  in 101 MHz.

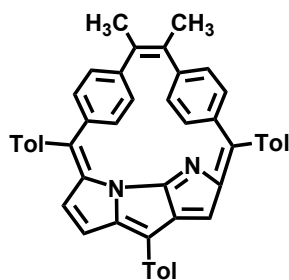

Compound 4

## DEPARTMENT OF CHEMISTRY, I.I.T.(B)

**Analysis Info**

Analysis Name D:\Data\MAR-21\MR-RS-T0L-TOL.d  
 Method NaICSI\_pos\_1500.m  
 Sample Name MR-RS-T0L-TOL  
 Comment C48H38N2

Acquisition Date 3/9/2021 2:19:00 PM

Operator srk in  
 Instrument maXis impact 282001.00081

**Acquisition Parameter**

|             |            |                      |          |                  |           |
|-------------|------------|----------------------|----------|------------------|-----------|
| Source Type | ESI        | Ion Polarity         | Positive | Set Nebulizer    | 0.3 Bar   |
| Focus       | Not active | Set Capillary        | 3700 V   | Set Dry Heater   | 180 °C    |
| Scan Begin  | 50 m/z     | Set End Plate Offset | -500 V   | Set Dry Gas      | 4.0 l/min |
| Scan End    | 1500 m/z   | Set Charging Voltage | 2000 V   | Set Divert Valve | Source    |
|             |            | Set Corona           | 0 nA     | Set APCI Heater  | 0 °C      |

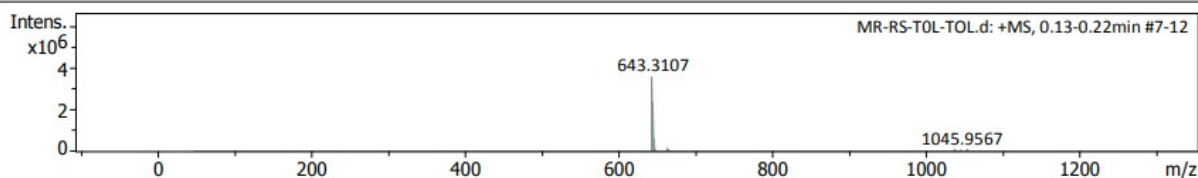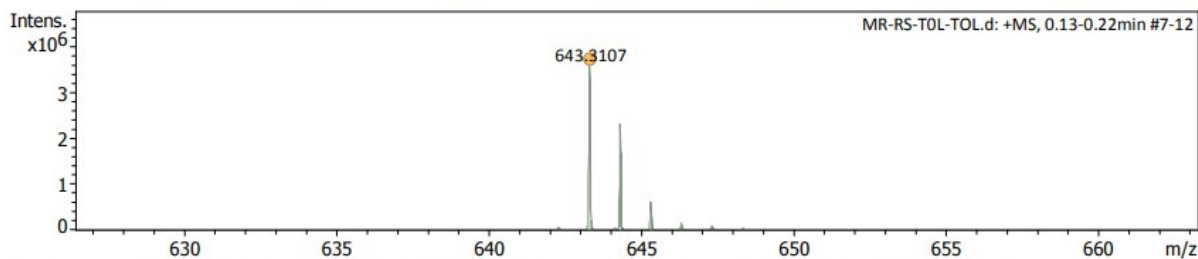

| Meas. m/z | # | Ion Formula | m/z      | err [ppm] | mSigma | # mSigma | Score  | rdb  | e <sup>-</sup> Conf | N-Rule |
|-----------|---|-------------|----------|-----------|--------|----------|--------|------|---------------------|--------|
| 643.3107  | 1 | C48H39N2    | 643.3108 | 0.1       | 62.4   | 1        | 100.00 | 31.0 | even                | ok     |

Figure S8. HR mass spectrum of the compound 4.

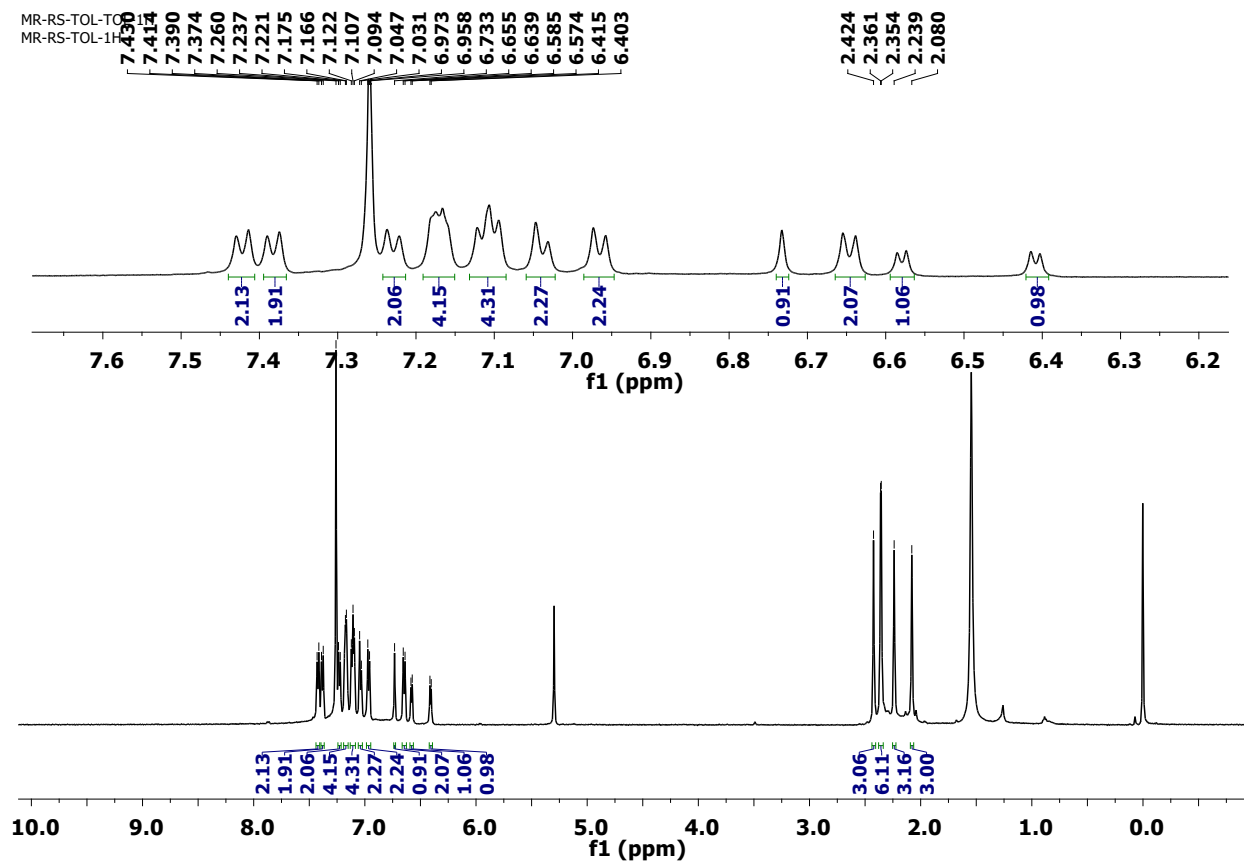

Figure S9.  $^1\text{H}$  NMR spectrum of the compound **4** recorded in  $\text{CDCl}_3$  in 500 MHz.



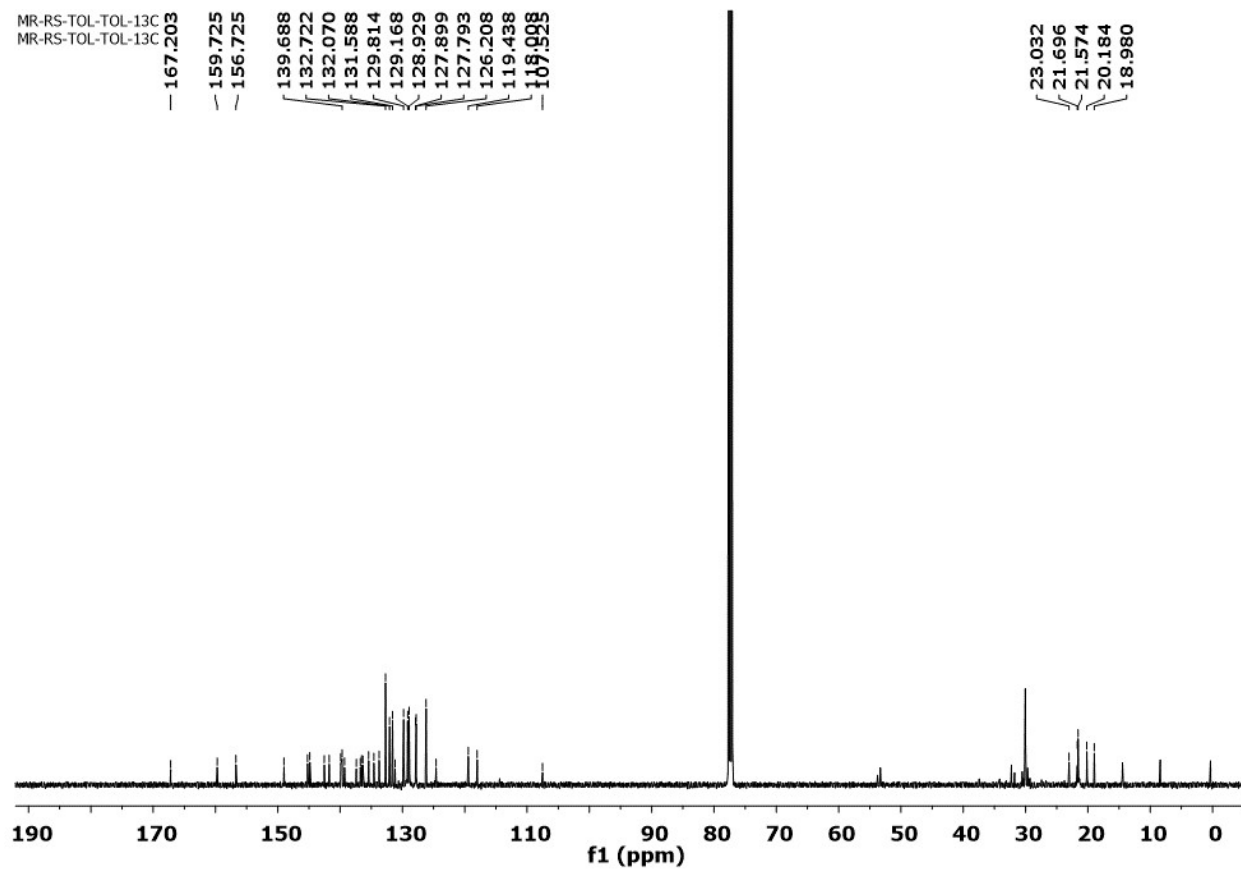

**Figure S10.**  $^{13}\text{C}\{^1\text{H}\}$  NMR spectrum of the compound **4** recorded in  $\text{CDCl}_3$ , in 126 MHz.

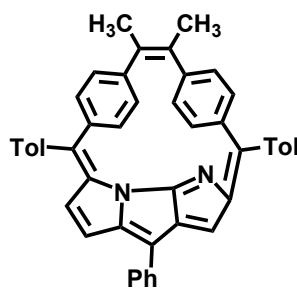

Compound 5

## DEPARTMENT OF CHEMISTRY, I.I.T.(B)

## Analysis Info

Analysis Name D:\Data\APR 21\MR-RS-TOL-PH.d  
 Method Tune\_pos\_NAICSI-1000a.m  
 Sample Name MR-RS-TOL-PH  
 Comment C47H36N2

Acquisition Date 4/12/2021 9:01:11 AM

Operator gkl-in  
 Instrument maXis impact 282001.00081

## Acquisition Parameter

|             |            |                      |          |                  |           |
|-------------|------------|----------------------|----------|------------------|-----------|
| Source Type | ESI        | Ion Polarity         | Positive | Set Nebulizer    | 0.3 Bar   |
| Focus       | Not active | Set Capillary        | 3700 V   | Set Dry Heater   | 180 °C    |
| Scan Begin  | 50 m/z     | Set End Plate Offset | -500 V   | Set Dry Gas      | 4.0 l/min |
| Scan End    | 3000 m/z   | Set Charging Voltage | 2000 V   | Set Divert Valve | Source    |
|             |            | Set Corona           | 0 nA     | Set APCI Heater  | 0 °C      |

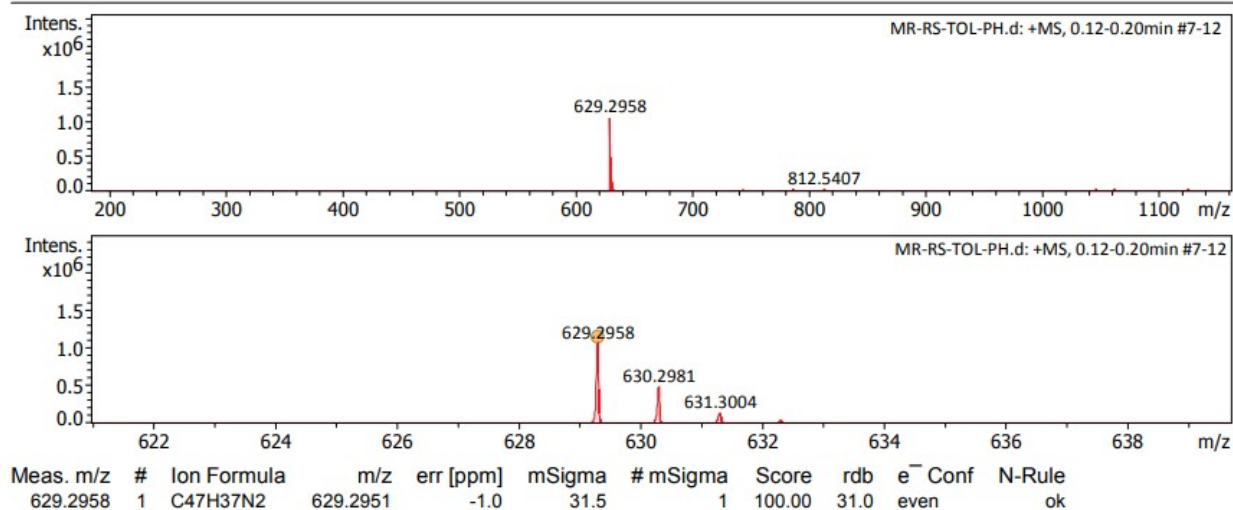

Figure S11. HR mass spectrum of the compound 5.

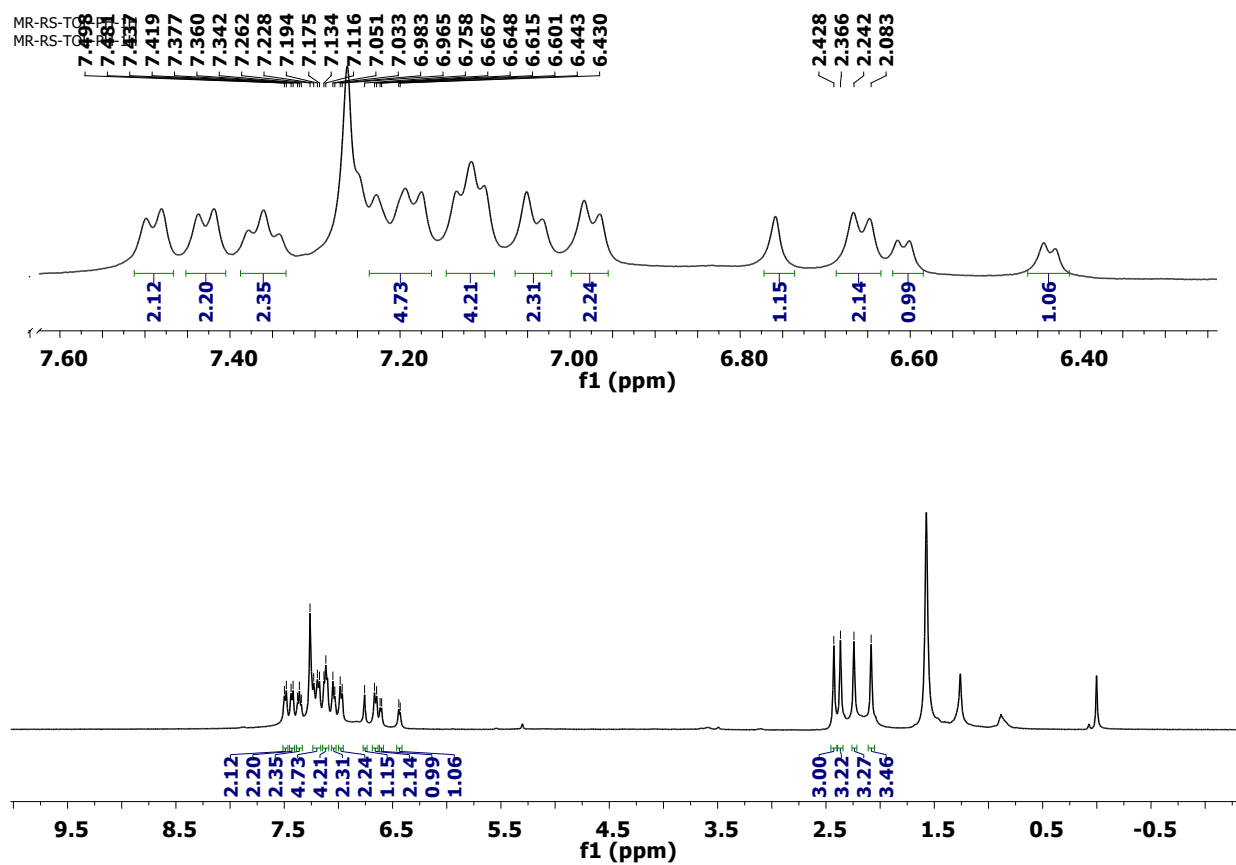

Figure S12.  $^1\text{H}$  NMR spectrum of the compound **5** recorded in  $\text{CDCl}_3$  in 400 MHz.

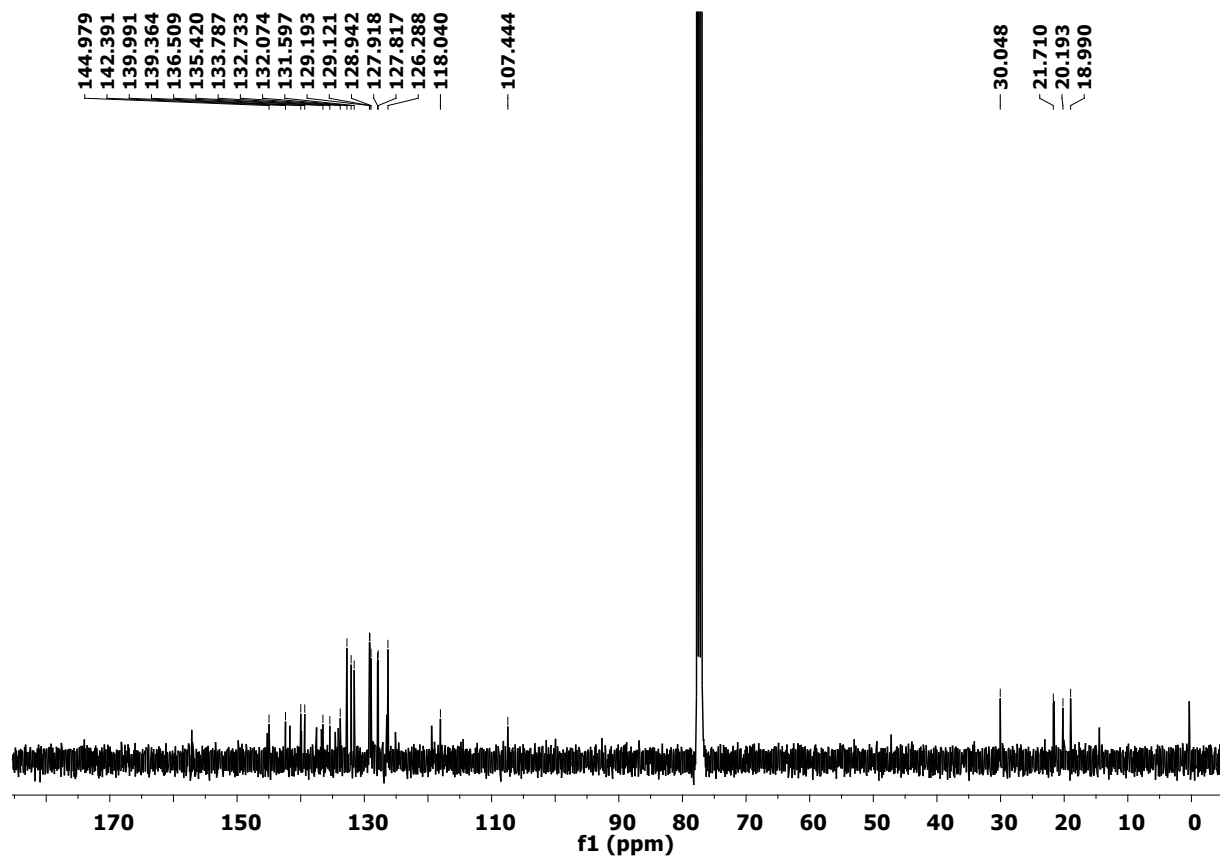

Figure S13.  $^{13}\text{C}\{^1\text{H}\}$  NMR spectrum of the compound **5** recorded in  $\text{CDCl}_3$  in 101 MHz.

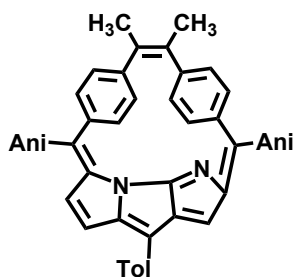

Compound 6

## DEPARTMENT OF CHEMISTRY, I.I.T.(B)

**Analysis Info**

Analysis Name D:\Data\MAR-21\MR-RS-ANI-TOL1.d  
 Method NaICsl\_pos\_1500.m  
 Sample Name MR-RS-ANI-TOL1  
 Comment C48H38N2O2

Acquisition Date 3/11/2021 12:52:50 PM

Operator PG SRD out  
 Instrument maXis impact 282001.00081

**Acquisition Parameter**

|             |            |                      |          |                  |           |
|-------------|------------|----------------------|----------|------------------|-----------|
| Source Type | ESI        | Ion Polarity         | Positive | Set Nebulizer    | 0.3 Bar   |
| Focus       | Not active | Set Capillary        | 3700 V   | Set Dry Heater   | 180 °C    |
| Scan Begin  | 50 m/z     | Set End Plate Offset | -500 V   | Set Dry Gas      | 4.0 l/min |
| Scan End    | 1500 m/z   | Set Charging Voltage | 2000 V   | Set Divert Valve | Source    |
|             |            | Set Corona           | 0 nA     | Set APCI Heater  | 0 °C      |

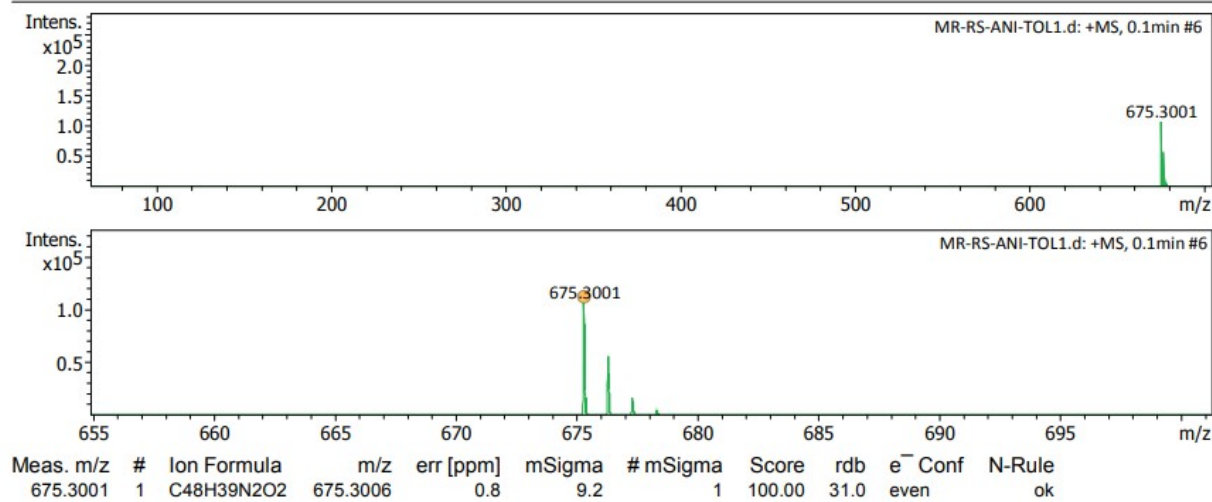

Figure S14. HR mass spectrum of the compound 6.

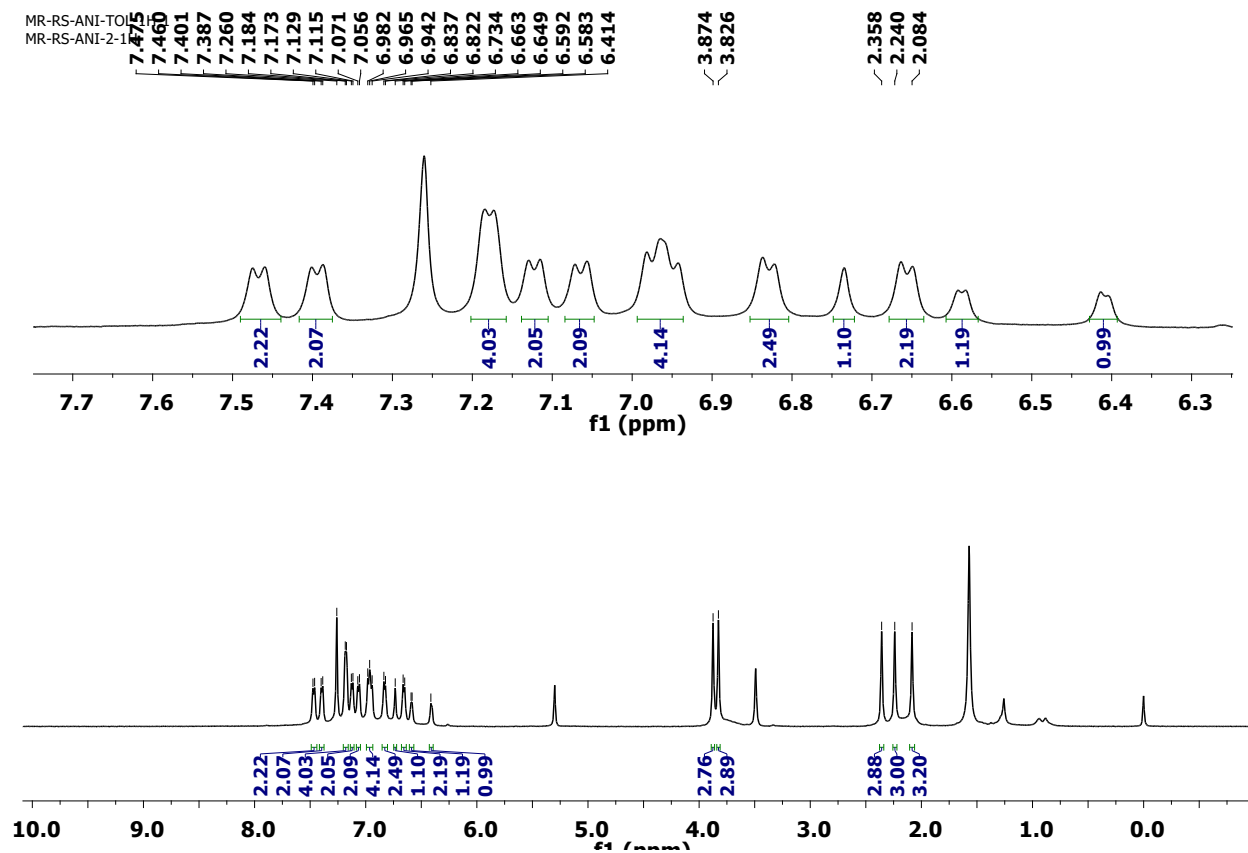

Figure S15.  $^1\text{H}$  NMR spectrum of the compound **6** recorded in  $\text{CDCl}_3$  in 500 MHz.

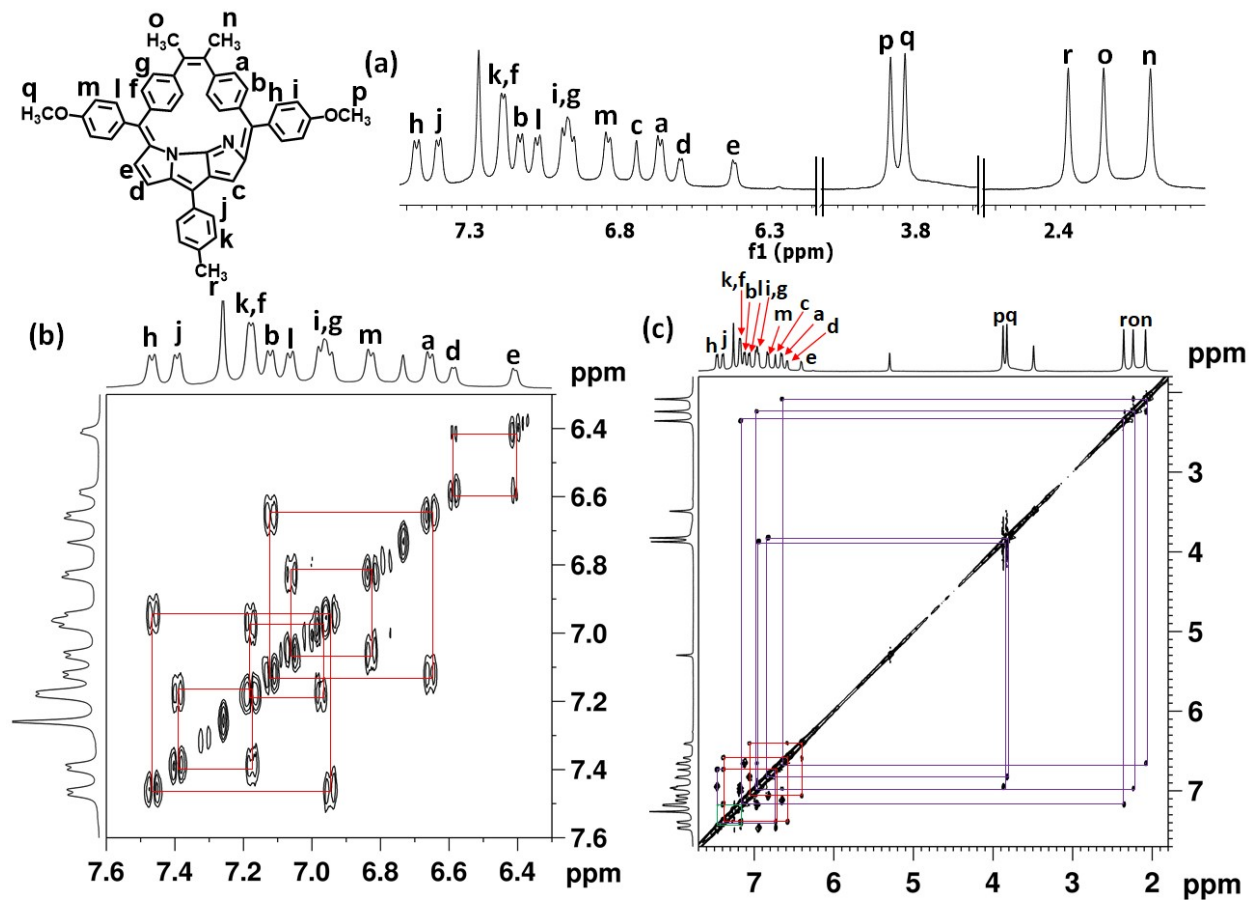

**Figure S16.**  $^1\text{H}$ - $^1\text{H}$  COSY and  $^1\text{H}$ - $^1\text{H}$  NOESY spectra of the compound **6** recorded in  $\text{CDCl}_3$  in 500 MHz.

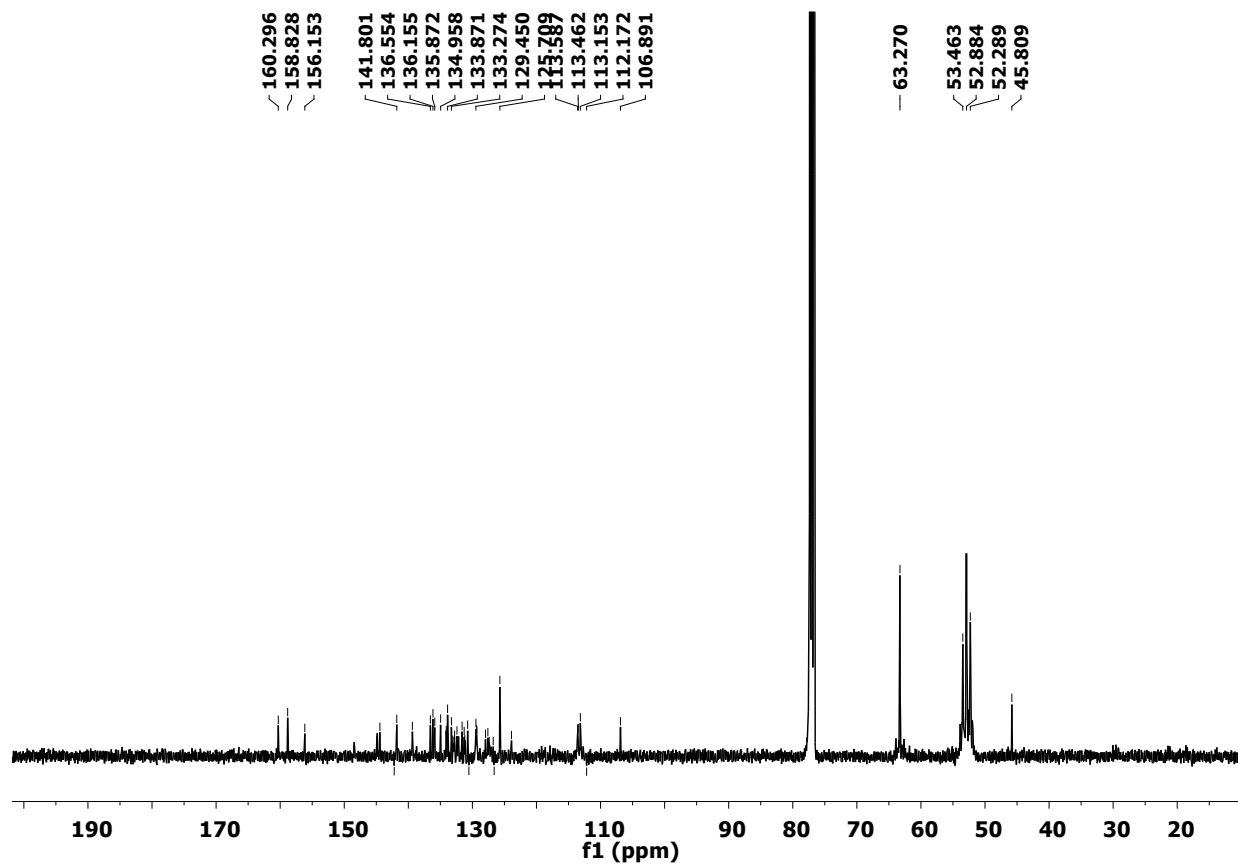

Figure S17.  $^{13}\text{C}\{^1\text{H}\}$  NMR spectrum of the compound 6 recorded in  $\text{CDCl}_3$  in 101 MHz.



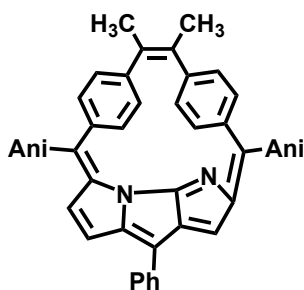

Compound 7

## DEPARTMENT OF CHEMISTRY, I.I.T.(B)

## Analysis Info

Analysis Name D:\Data\MR-RS-ANI-PH.d  
 Method NaICsI\_pos\_1500.m  
 Sample Name MR-RS-ANI-PH  
 Comment C47H36N2O2

Acquisition Date 3/16/2021 2:37:15 PM

Operator AK IN  
 Instrument maXis impact 282001.00081

## Acquisition Parameter

|             |            |                      |          |                  |           |
|-------------|------------|----------------------|----------|------------------|-----------|
| Source Type | ESI        | Ion Polarity         | Positive | Set Nebulizer    | 0.3 Bar   |
| Focus       | Not active | Set Capillary        | 3700 V   | Set Dry Heater   | 180 °C    |
| Scan Begin  | 50 m/z     | Set End Plate Offset | -500 V   | Set Dry Gas      | 4.0 l/min |
| Scan End    | 1500 m/z   | Set Charging Voltage | 2000 V   | Set Divert Valve | Source    |
|             |            | Set Corona           | 0 nA     | Set APCI Heater  | 0 °C      |

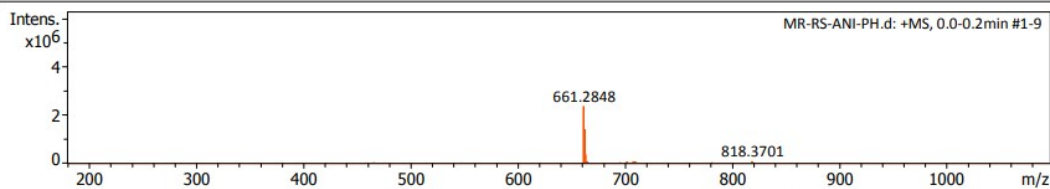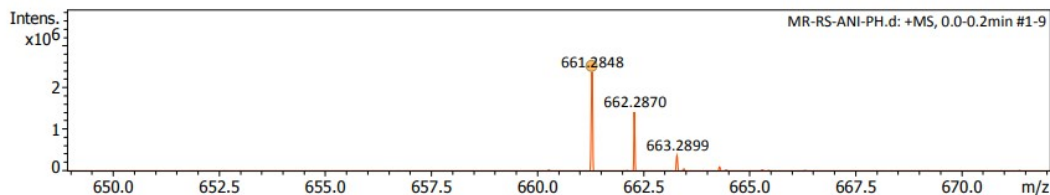

| Meas. m/z | # | Ion Formula | m/z      | err [ppm] | mSigma | # mSigma | Score  | rdb  | e <sup>-</sup> Conf | N-Rule |
|-----------|---|-------------|----------|-----------|--------|----------|--------|------|---------------------|--------|
| 661.2848  | 1 | C47H37N2O2  | 661.2850 | 0.2       | 39.7   | 1        | 100.00 | 31.0 | even                | ok     |

Figure S18. HR mass spectrum of the compound 7.

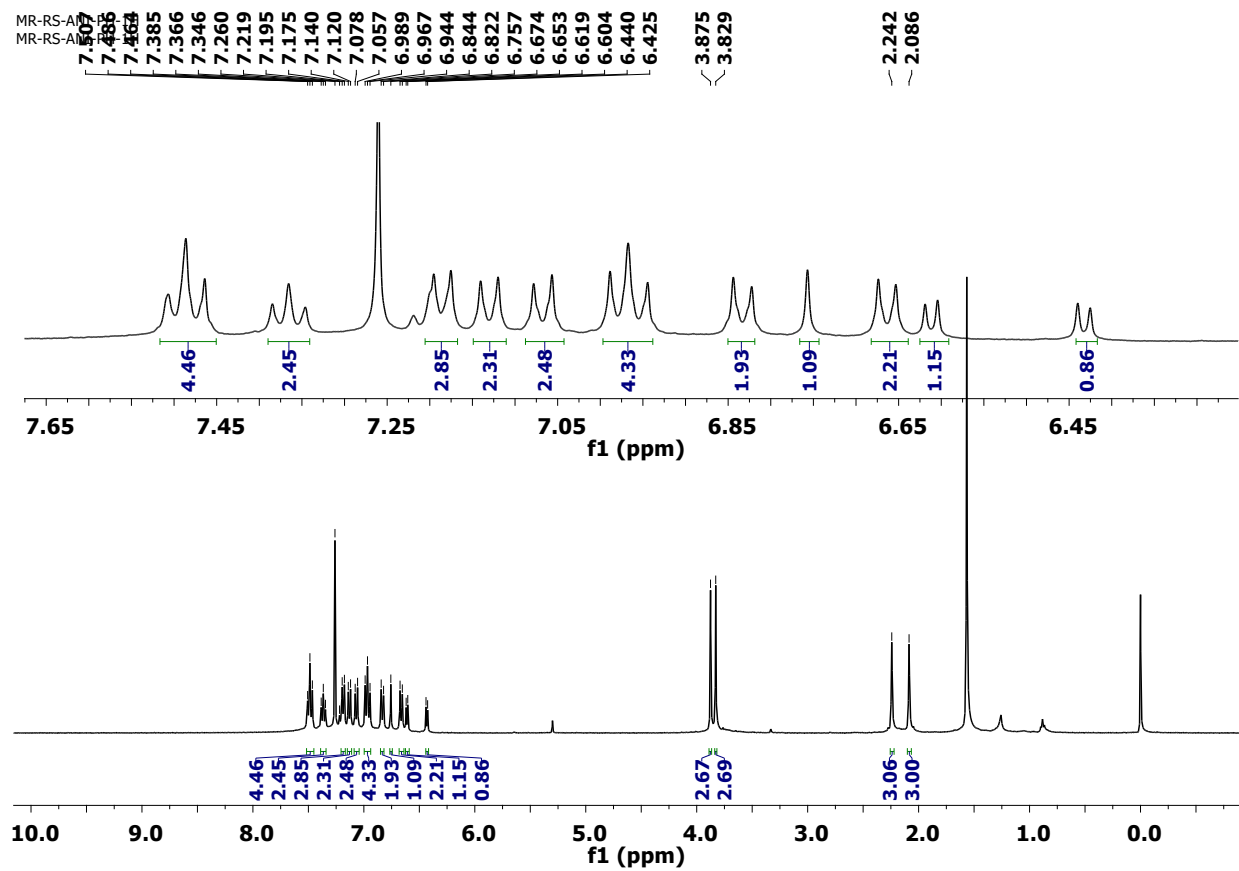

Figure S19.  $^1\text{H}$  NMR spectrum of the compound **7** recorded in  $\text{CDCl}_3$  in 400 MHz.

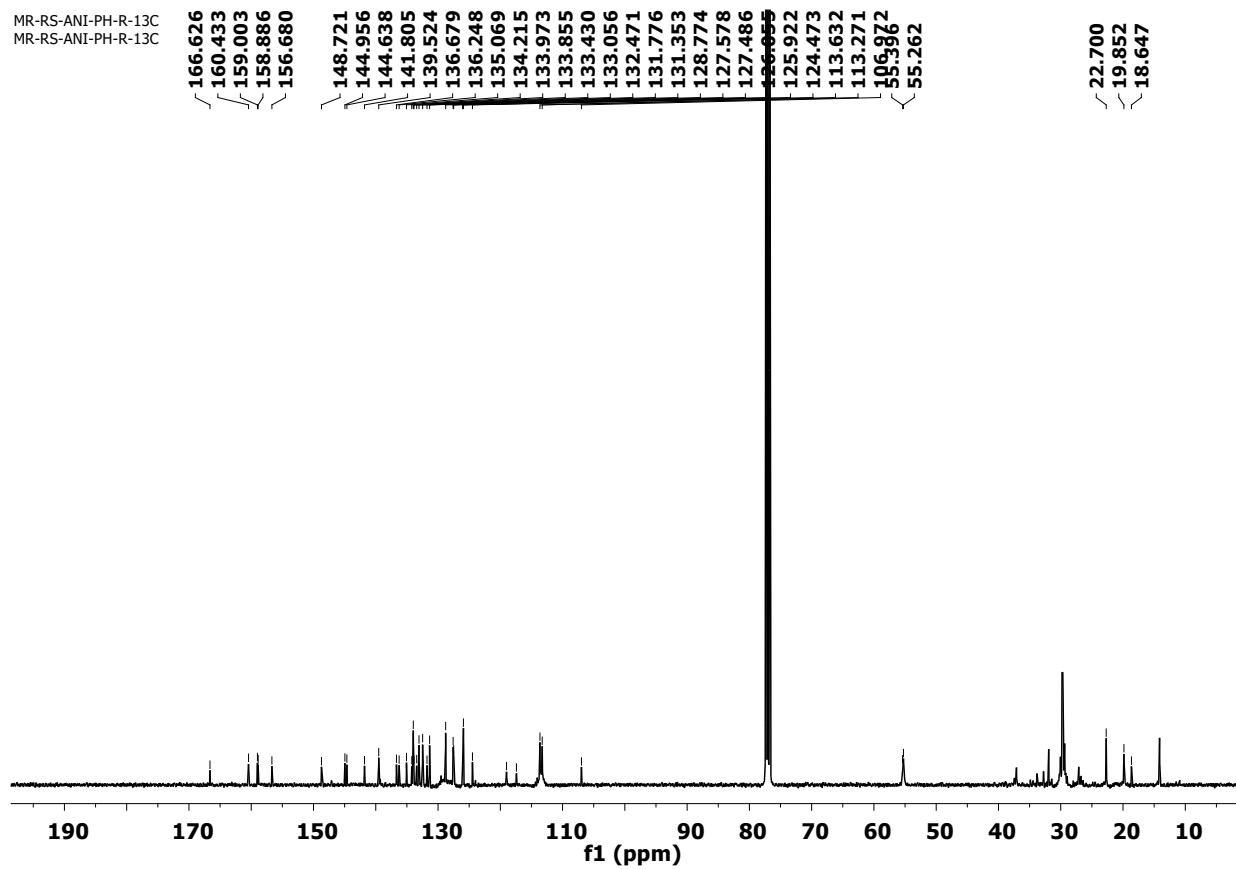

Figure S20.  $^{13}\text{C}\{^1\text{H}\}$  NMR spectrum of the compound **7** recorded in  $\text{CDCl}_3$  in 101 MHz.

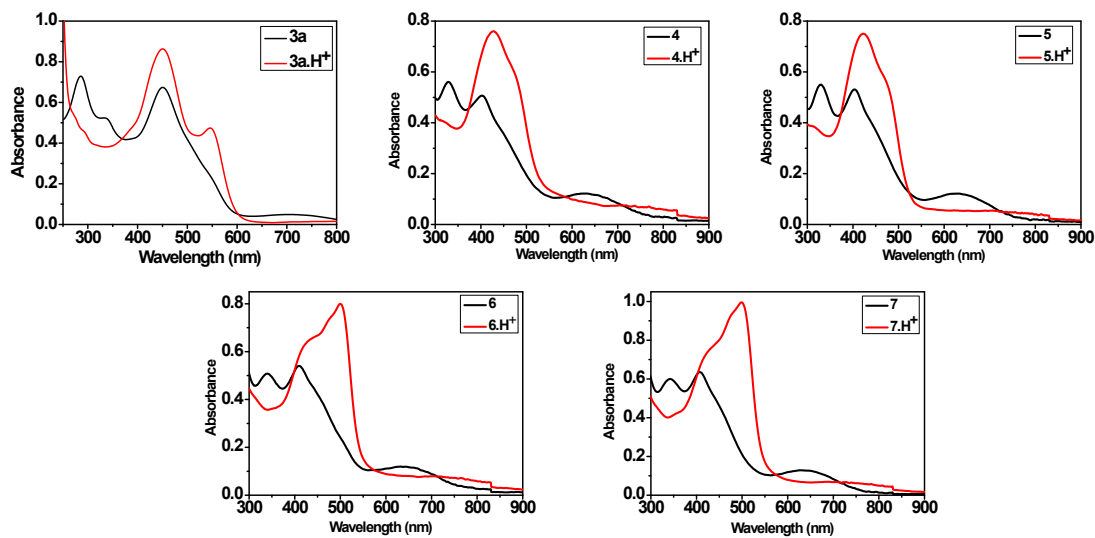

**Figure S21.** Comparison of absorption spectra of the compounds **3-7** (25  $\mu$ M) free base and in presence of TFA (100 eq.) recorded in chloroform at room temperature.

**Table S2.** Crystal data and data correction parameters for compound **6**.

|                                      |                                                                                 |
|--------------------------------------|---------------------------------------------------------------------------------|
| CCDC                                 | 2078340                                                                         |
| Identification code                  | MR_RS_Confuse_autored                                                           |
| Empirical formula                    | C <sub>102</sub> H <sub>82</sub> Cl <sub>18</sub> N <sub>3</sub> O <sub>4</sub> |
| Formula weight                       | 2051.80                                                                         |
| Temperature/K                        | 150.00(10)                                                                      |
| Crystal system                       | Triclinic                                                                       |
| Space group                          | P1                                                                              |
| a/Å                                  | 12.5432(7)                                                                      |
| b/Å                                  | 14.2515(8)                                                                      |
| c/Å                                  | 14.5415(8)                                                                      |
| α/°                                  | 110.146(5)                                                                      |
| β/°                                  | 93.841(4)                                                                       |
| γ/°                                  | 100.900(5)                                                                      |
| Volume/Å <sup>3</sup>                | 2371.6(2)                                                                       |
| Z                                    | 1                                                                               |
| ρ <sub>calc</sub> /g/cm <sup>3</sup> | 1.437                                                                           |
| μ/mm <sup>-1</sup>                   | 0.574                                                                           |
| F(000)                               | 1053.0                                                                          |
| Crystal size/mm <sup>3</sup>         | ? × ? × ?                                                                       |
| Radiation                            | MoKα (λ = 0.71073)                                                              |
| 2θ range for data collection/°       | 3.014 to 50                                                                     |
| Index ranges                         | -14 ≤ h ≤ 14, -16 ≤ k ≤ 16, -17 ≤ l ≤ 17                                        |
| Reflections collected                | 106960                                                                          |
| Independent reflections              | 16654 [R <sub>int</sub> = 0.1001, R <sub>sigma</sub> = 0.0681]                  |
| Data/restraints/parameters           | 16654/3/1148                                                                    |
| Goodness-of-fit on F <sup>2</sup>    | 1.044                                                                           |

|                                                |                                  |
|------------------------------------------------|----------------------------------|
| Final R indexes [ $I \geq 2\sigma(I)$ ]        | $R_1 = 0.0807$ , $wR_2 = 0.2123$ |
| Final R indexes [all data]                     | $R_1 = 0.1212$ , $wR_2 = 0.2521$ |
| Largest diff. peak/hole / $e \text{ \AA}^{-3}$ | 1.52/-0.92                       |
| Flack parameter                                | 0.46(6)                          |

---

**Table S3.** Selected bond lengths ( $\text{\AA}$ ) for compound **6**.

| Atom | Atom | Length/ $\text{\AA}$ | Atom | Atom | Length/ $\text{\AA}$ |
|------|------|----------------------|------|------|----------------------|
| O2   | C45  | 1.392(19)            | C17  | C18  | 1.438(19)            |
| O2   | C48  | 1.36(2)              | C35  | C40  | 1.42(2)              |
| C3   | C2   | 1.461(19)            | C37  | C38  | 1.38(2)              |
| C3   | C6   | 1.404(19)            | C19  | C20  | 1.464(18)            |
| C3   | C4   | 1.41(2)              | C19  | C42  | 1.51(2)              |
| O1   | C31  | 1.372(17)            | C19  | C18  | 1.398(19)            |
| O1   | C34  | 1.397(18)            | C40  | C39  | 1.41(2)              |
| N1   | C10  | 1.454(18)            | C20  | C23  | 1.415(18)            |
| N1   | C13  | 1.304(18)            | C25  | C22  | 1.38(2)              |
| C14  | C15  | 1.36(2)              | C25  | C1   | 1.520(19)            |
| C14  | C12  | 1.488(18)            | C25  | C24  | 1.387(19)            |
| C14  | C35  | 1.452(19)            | C33  | C32  | 1.40(2)              |
| C21  | C20  | 1.424(19)            | C33  | C28  | 1.432(19)            |
| C21  | C22  | 1.35(2)              | C42  | C47  | 1.37(2)              |
| C16  | C15  | 1.43(2)              | C31  | C30  | 1.36(2)              |
| C16  | C17  | 1.38(2)              | C31  | C32  | 1.41(2)              |
| C15  | N2   | 1.442(18)            | C38  | C39  | 1.41(3)              |
| C10  | C11  | 1.479(19)            | C38  | C41  | 1.52(2)              |
| C10  | C9   | 1.35(2)              | C9   | C28  | 1.46(2)              |
| C36  | C35  | 1.36(2)              | C7   | C6   | 1.406(19)            |
| C36  | C37  | 1.43(2)              | N2   | C13  | 1.395(18)            |
| C8   | C9   | 1.536(19)            | N2   | C18  | 1.414(18)            |
| C8   | C7   | 1.40(2)              | C30  | C29  | 1.37(2)              |
| C8   | C5   | 1.330(19)            | C29  | C28  | 1.36(2)              |
| C27  | C2   | 1.52(2)              | C47  | C46  | 1.41(2)              |
| C43  | C42  | 1.437(19)            | C23  | C24  | 1.366(19)            |
| C43  | C44  | 1.37(2)              | C46  | C45  | 1.39(2)              |
| C12  | C11  | 1.37(2)              | C1   | C26  | 1.51(2)              |
| C12  | C13  | 1.428(19)            | C4   | C5   | 1.40(2)              |
| C2   | C1   | 1.30(2)              | C45  | C44  | 1.37(2)              |

Table S4. Selected bond angles [°] for compounds 6.

| Atom | Atom | Atom | Angle/°   | Atom | Atom | Atom | Angle/°   |
|------|------|------|-----------|------|------|------|-----------|
| C48  | O2   | C45  | 118.0(13) | C43  | C42  | C19  | 119.5(13) |
| C6   | C3   | C2   | 122.4(13) | C47  | C42  | C43  | 118.7(13) |
| C4   | C3   | C2   | 120.2(13) | C47  | C42  | C19  | 121.8(11) |
| C4   | C3   | C6   | 116.7(13) | O1   | C31  | C32  | 114.1(12) |
| C31  | O1   | C34  | 118.2(12) | C30  | C31  | O1   | 125.9(13) |
| C13  | N1   | C10  | 101.4(11) | C30  | C31  | C32  | 120.0(13) |
| C15  | C14  | C12  | 104.1(12) | C37  | C38  | C39  | 119.3(15) |
| C15  | C14  | C35  | 129.7(13) | C37  | C38  | C41  | 120.5(16) |
| C35  | C14  | C12  | 126.2(13) | C39  | C38  | C41  | 120.2(15) |
| C22  | C21  | C20  | 122.5(13) | C21  | C22  | C25  | 122.7(14) |
| C17  | C16  | C15  | 109.1(12) | C38  | C39  | C40  | 120.4(15) |
| C14  | C15  | C16  | 141.8(14) | C10  | C9   | C8   | 117.9(13) |
| C14  | C15  | N2   | 113.2(12) | C10  | C9   | C28  | 124.4(13) |
| C16  | C15  | N2   | 104.9(12) | C28  | C9   | C8   | 117.3(13) |
| N1   | C10  | C11  | 110.4(12) | C8   | C7   | C6   | 118.6(13) |
| C9   | C10  | N1   | 122.8(12) | C13  | N2   | C15  | 105.8(11) |
| C9   | C10  | C11  | 126.3(14) | C13  | N2   | C18  | 143.1(12) |
| C35  | C36  | C37  | 122.6(15) | C18  | N2   | C15  | 110.8(11) |
| C7   | C8   | C9   | 118.0(12) | C31  | C30  | C29  | 120.5(14) |
| C5   | C8   | C9   | 121.1(13) | C3   | C6   | C7   | 121.5(13) |
| C5   | C8   | C7   | 120.2(13) | C28  | C29  | C30  | 123.6(14) |
| C44  | C43  | C42  | 120.7(14) | C42  | C47  | C46  | 119.6(13) |
| C11  | C12  | C14  | 146.1(13) | C24  | C23  | C20  | 121.9(13) |
| C11  | C12  | C13  | 105.8(12) | N1   | C13  | C12  | 117.6(13) |
| C13  | C12  | C14  | 108.1(12) | N1   | C13  | N2   | 133.7(13) |
| C3   | C2   | C27  | 112.9(13) | N2   | C13  | C12  | 108.7(12) |
| C1   | C2   | C3   | 121.9(12) | C45  | C46  | C47  | 120.7(15) |
| C1   | C2   | C27  | 125.1(13) | C2   | C1   | C25  | 121.9(13) |
| C16  | C17  | C18  | 110.6(12) | C2   | C1   | C26  | 124.6(13) |
| C12  | C11  | C10  | 104.9(13) | C26  | C1   | C25  | 113.5(12) |
| C36  | C35  | C14  | 121.3(14) | C33  | C32  | C31  | 118.1(13) |
| C36  | C35  | C40  | 118.1(14) | C3   | C4   | C5   | 119.9(14) |
| C40  | C35  | C14  | 120.6(13) | C23  | C24  | C25  | 122.5(12) |
| C38  | C37  | C36  | 119.2(16) | C8   | C5   | C4   | 121.9(14) |
| C20  | C19  | C42  | 114.1(11) | C46  | C45  | O2   | 123.4(16) |
| C18  | C19  | C20  | 128.8(13) | C44  | C45  | O2   | 116.3(14) |
| C18  | C19  | C42  | 117.1(12) | C44  | C45  | C46  | 120.3(15) |

|     |     |     |           |     |     |     |           |
|-----|-----|-----|-----------|-----|-----|-----|-----------|
| C39 | C40 | C35 | 120.3(15) | C45 | C44 | C43 | 119.9(14) |
| C21 | C20 | C19 | 119.9(11) | C17 | C18 | N2  | 104.6(12) |
| C21 | C20 | C23 | 114.2(12) | C19 | C18 | C17 | 123.9(13) |
| C23 | C20 | C19 | 125.6(12) | C19 | C18 | N2  | 131.5(12) |
| C22 | C25 | C1  | 121.1(12) | C9  | C28 | C33 | 121.5(13) |
| C24 | C25 | C22 | 116.0(13) | C29 | C28 | C33 | 116.2(13) |
| C24 | C25 | C1  | 122.9(13) | C29 | C28 | C9  | 122.1(13) |
| C32 | C33 | C28 | 121.5(13) |     |     |     |           |



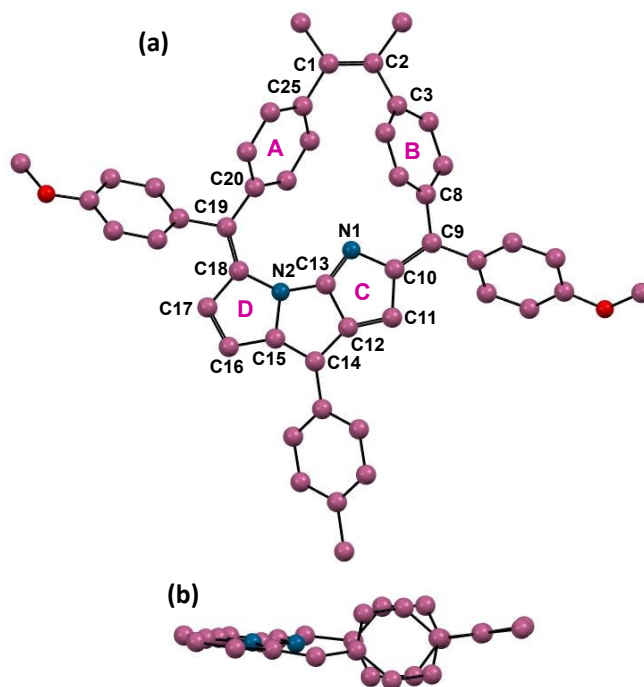

**Figure S22.** Ground state optimized structures of compound **6** ((A) top view (B) side view).

**Table S5.** S<sub>0</sub> optimized geometry of the compound **6** at B3LYP/6-31g (d,p) level of theory

# Sum of imaginary frequencies= 0

# Total Energy (hartree) = -2111.92842359

| Atom | X       | Y       | Z       | Atom | X       | Y       | Z       |
|------|---------|---------|---------|------|---------|---------|---------|
| O    | 8.61687 | 1.73208 | 0.84275 | C    | -2.2642 | -3.5872 | -0.5946 |
| C    | -0.2397 | -4.7476 | 0.08008 | H    | -3.0811 | -3.4653 | -1.2994 |
| O    | -8.4212 | -1.4493 | -0.1321 | N    | 0.85603 | 1.79829 | -0.1785 |
| N    | -0.6199 | -0.1899 | 0.16573 | C    | -6.3802 | -2.3302 | 0.89354 |
| C    | -0.9077 | 3.34293 | -0.1276 | H    | -6.9118 | -3.0405 | 1.51527 |
| C    | 3.47334 | -1.7436 | 0.63779 | C    | -1.3637 | -4.6372 | -0.7532 |
| H    | 4.16569 | -1.3693 | 1.38448 | H    | -1.4866 | -5.3189 | -1.5905 |
| C    | 1.66114 | 3.93656 | -0.3826 | C    | -4.9901 | -2.2698 | 0.96181 |
| H    | 1.70551 | 5.01089 | -0.4839 | H    | -4.4658 | -2.9379 | 1.63784 |
| C    | 0.46325 | 3.16756 | -0.2594 | C    | 5.55052 | 0.35058 | -0.6944 |
| C    | -2.0414 | -0.1556 | 0.26921 | H    | 5.24495 | -0.2895 | -1.5162 |
| C    | -2.876  | 4.71728 | 0.53483 | C    | 1.90927 | -1.3553 | -1.1472 |
| H    | -3.2411 | 3.87545 | 1.11463 | H    | 1.38414 | -0.6867 | -1.82   |
| C    | -2.0499 | -2.6078 | 0.39025 | C    | -0.3054 | 1.06377 | 0.03612 |
| C    | 0.55276 | -7.1198 | -0.3771 | C    | 6.90837 | 0.60302 | -0.5029 |
| H    | 0.25885 | -7.5176 | 0.60245 | H    | 7.63043 | 0.16218 | -1.1798 |
| H    | 1.36799 | -7.7337 | -0.7611 | C    | 2.12627 | -5.1201 | -0.4842 |
| H    | -0.31   | -7.2661 | -1.0376 | C    | -6.3448 | -0.5771 | -0.7772 |
| C    | 5.00721 | 1.71753 | 1.20455 | H    | -6.8906 | 0.05455 | -1.4703 |
| H    | 4.27392 | 2.1373  | 1.88618 | C    | -0.1478 | -3.882  | 1.18079 |
| C    | -1.4269 | 2.00819 | 0.06632 | H    | 0.68046 | -3.9908 | 1.8726  |
| C    | 0.89656 | -5.6516 | -0.2714 | C    | 1.71529 | -2.7303 | -1.2621 |
| C    | 2.71732 | 3.07856 | -0.3422 | H    | 1.02219 | -3.1058 | -2.0078 |
| H    | 3.75803 | 3.34786 | -0.4352 | C    | -1.0228 | -2.8151 | 1.32304 |
| C    | -2.537  | 1.22585 | 0.23218 | H    | -0.8739 | -2.0939 | 2.1182  |
| H    | -3.5679 | 1.52592 | 0.33932 | C    | 7.31892 | 1.42138 | 0.5575  |
| C    | -1.6584 | 4.59661 | -0.1609 | C    | 6.35611 | 1.97313 | 1.41395 |
| C    | -3.6022 | 5.90425 | 0.51402 | H    | 6.69031 | 2.58888 | 2.24253 |
| H    | -4.5377 | 5.96439 | 1.06546 | C    | 2.27004 | 1.69465 | -0.1934 |
| C    | 3.11991 | 0.61356 | -0.0878 | C    | -4.2473 | -1.3536 | 0.19688 |
| C    | -1.2158 | 5.71667 | -0.8907 | C    | 3.36161 | -5.9304 | -0.8125 |
| H    | -0.3112 | 5.64352 | -1.4859 | H    | 4.16892 | -5.7071 | -0.105  |
| C    | 2.79048 | -0.8251 | -0.1881 | H    | 3.74317 | -5.6627 | -1.8057 |
| C    | 2.36939 | -3.6392 | -0.4154 | H    | 3.19428 | -7.0077 | -0.7909 |
| C    | -4.9624 | -0.5207 | -0.6908 | C    | -9.2061 | -2.3436 | 0.64329 |
| H    | -4.4164 | 0.154   | -1.3406 | H    | -8.9643 | -3.3906 | 0.42149 |

|   |         |         |         |   |         |         |         |
|---|---------|---------|---------|---|---------|---------|---------|
| C | 4.56765 | 0.90897 | 0.13749 | H | -10.243 | -2.1486 | 0.36795 |
| C | -7.0681 | -1.4752 | 0.02232 | H | -9.0781 | -2.1654 | 1.71829 |
| C | -3.1513 | 7.02331 | -0.1981 | C | -3.9252 | 8.31963 | -0.1934 |
| C | 3.26935 | -3.1123 | 0.52599 | H | -4.9946 | 8.14755 | -0.0385 |
| H | 3.79278 | -3.7815 | 1.20386 | H | -3.8032 | 8.86253 | -1.1359 |
| C | -1.9455 | 6.90105 | -0.9023 | H | -3.5841 | 8.98567 | 0.60965 |
| H | -1.58   | 7.74429 | -1.4839 | C | 9.63477 | 1.19291 | 0.01388 |
| C | -2.7773 | -1.3197 | 0.31767 | H | 9.53138 | 1.52881 | -1.0258 |
|   |         |         |         | H | 9.63768 | 0.09567 | 0.03674 |
|   |         |         |         | H | 10.5786 | 1.5623  | 0.41742 |

**Table S6.**  $S_0$  optimized geometry of the compound **3a** at B3LYP/6-31g (d,p) level of theory

# Sum of imaginary frequencies= 0

# Total Energy (hartree) = -2753.44351623

| Atom | X        | Y        | Z        | Atom | X        | Y        | Z        |
|------|----------|----------|----------|------|----------|----------|----------|
| C    | -2.37195 | -4.58135 | -1.00894 | C    | 4.065486 | 5.468932 | -1.09757 |
| C    | -1.2167  | -5.19623 | -0.61659 | C    | 3.243809 | 4.348322 | -1.02944 |
| C    | -3.67397 | -5.29583 | -1.30223 | C    | 4.516781 | 7.9394   | -0.73797 |
| C    | -1.11645 | -6.7006  | -0.44329 | O    | -8.38142 | 1.443752 | 1.522359 |
| C    | -3.05465 | 0.733524 | -0.29371 | C    | -8.68799 | 2.245973 | 2.652245 |
| C    | -4.43453 | 0.941065 | 0.205171 | O    | 8.071734 | -1.7241  | 1.606844 |
| C    | 2.566048 | -1.52763 | 0.286462 | C    | 8.960057 | -2.64216 | 0.986747 |
| C    | 4.006985 | -1.60412 | 0.618136 | H    | -3.64078 | -6.37359 | -1.14357 |
| C    | -5.53718 | 0.324412 | -0.42642 | H    | -3.98499 | -5.11046 | -2.33796 |
| C    | -6.8306  | 0.514289 | 0.02979  | H    | -4.47057 | -4.88807 | -0.66757 |
| C    | -7.07452 | 1.324107 | 1.151052 | H    | -1.95388 | -7.23737 | -0.88513 |
| C    | -5.99858 | 1.932748 | 1.806751 | H    | -0.19914 | -7.07637 | -0.90682 |
| C    | -4.70038 | 1.731921 | 1.335494 | H    | -1.07372 | -6.96952 | 0.619276 |
| C    | 4.580541 | -0.75261 | 1.58555  | H    | -5.36469 | -0.29874 | -1.29799 |
| C    | 5.931061 | -0.81736 | 1.891857 | H    | -7.67637 | 0.049205 | -0.46595 |
| C    | 6.760618 | -1.74036 | 1.236868 | H    | -6.15355 | 2.541766 | 2.689437 |
| C    | 6.212106 | -2.60189 | 0.278167 | H    | -3.87078 | 2.180088 | 1.872721 |
| C    | 4.850595 | -2.5314  | -0.01394 | H    | 3.944705 | -0.05072 | 2.114198 |
| C    | -2.48489 | -3.10408 | -1.1737  | H    | 6.36879  | -0.1713  | 2.645536 |
| C    | -2.22848 | -2.34853 | -2.29329 | H    | 6.830365 | -3.32086 | -0.24574 |
| C    | -2.33893 | -0.94659 | -2.07856 | H    | 4.436698 | -3.19617 | -0.7649  |
| C    | -2.72176 | -0.60588 | -0.79958 | H    | -1.91118 | -2.78861 | -3.23236 |
| S    | -2.96438 | -2.06327 | 0.155184 | H    | -2.16338 | -0.20257 | -2.8472  |
| C    | 0.026719 | -4.48698 | -0.26956 | H    | 1.127692 | -5.98154 | 0.889051 |
| C    | 1.091102 | -4.97538 | 0.48908  | H    | 2.972568 | -4.21398 | 1.344113 |

|   |          |          |          |   |          |          |          |
|---|----------|----------|----------|---|----------|----------|----------|
| C | 2.094668 | -4.01772 | 0.740198 | H | -3.60809 | 3.54287  | -0.40712 |
| C | 1.818699 | -2.76811 | 0.187935 | H | -1.4784  | 5.087777 | -0.69195 |
| S | 0.30907  | -2.8253  | -0.67803 | H | 3.613456 | 1.2266   | -0.05311 |
| C | -2.19176 | 1.813404 | -0.34881 | H | 0.471694 | 5.816861 | 0.267781 |
| C | -2.57772 | 3.219144 | -0.40318 | H | 1.917203 | 7.791962 | 0.109306 |
| C | -1.47888 | 4.015592 | -0.55892 | H | 5.079052 | 5.362439 | -1.47718 |
| C | -0.31548 | 3.181962 | -0.54218 | H | 3.615522 | 3.388133 | -1.3731  |
| N | -0.78781 | 1.84248  | -0.45448 | H | 5.241104 | 7.868176 | -1.55527 |
| C | 1.075658 | 3.251493 | -0.50264 | H | 3.946182 | 8.863535 | -0.87149 |
| C | 1.510097 | 1.878673 | -0.33521 | H | 5.08893  | 8.043374 | 0.192999 |
| C | 0.322535 | 1.03422  | -0.27872 | H | -9.77252 | 2.20803  | 2.763217 |
| C | 2.55501  | 1.016989 | -0.08917 | H | -8.37633 | 3.288007 | 2.505605 |
| C | 1.942851 | -0.30083 | 0.087382 | H | -8.21827 | 1.856879 | 3.564536 |
| N | 0.535955 | -0.22193 | -0.02865 | H | 9.017558 | -2.48047 | -0.097   |
| C | 1.920637 | 4.442468 | -0.55704 | H | 9.9397   | -2.45738 | 1.429323 |
| C | 1.469373 | 5.711038 | -0.14525 | H | 8.667212 | -3.68191 | 1.179628 |
| C | 2.29643  | 6.827276 | -0.21991 |   |          |          |          |
| C | 3.611463 | 6.732003 | -0.69501 |   |          |          |          |

---

**Table S7.** Absorption and electrochemical data of the compounds **3-7**.

| Compound                | Absorption data |        |        |
|-------------------------|-----------------|--------|--------|
|                         | $\lambda$ (nm)  |        |        |
| <b>3a</b>               | 283             | 449    | 704    |
|                         | (4.46)          | (4.43) | (3.29) |
| <b>3a.H<sup>+</sup></b> | 449             | 545    | -      |
|                         | (4.53)          | (4.27) |        |
| <b>3b</b>               | 282             | 446    | 704    |
|                         | (4.42)          | (4.41) | (3.31) |
| <b>3b.H<sup>+</sup></b> | 450             | 545    | -      |
|                         | (4.55)          | (4.25) |        |
| <b>4</b>                | 328             | 403    | 631    |
|                         | (4.34)          | (4.32) | (3.68) |
| <b>4.H<sup>+</sup></b>  | -               | 427    | -      |
|                         |                 | (4.47) |        |
| <b>5</b>                | 328             | 403    | 630    |
|                         | (4.35)          | (4.30) | (3.69) |
| <b>5.H<sup>+</sup></b>  | -               | 422    | -      |
|                         |                 | (4.48) |        |
| <b>6</b>                | 339             | 409    | 640    |
|                         | (4.37)          | (4.40) | (3.70) |
| <b>6.H<sup>+</sup></b>  | -               | 499    | -      |
|                         |                 | (4.60) |        |
| <b>7</b>                | 340             | 407    | 637    |
|                         | (4.31)          | (4.33) | (3.67) |
| <b>7.H<sup>+</sup></b>  | -               | 499    | -      |
|                         |                 | (4.50) |        |

**References:**

- 1 O. Treutler and R. Ahlrichs, Efficient molecular numerical integration schemes, *J. Chem. Phys.*, 1995, **102**, 346–354.
- 2 A. D. Becke, A New Mixing of Hartree–Fock and Local Density-Functional Theories, *J. Chem. Phys.* 1993, **98**, 1372–1377.
- 3 W. J. Hehre, Ab Initio Molecular Orbital Theory, *Acc. Chem.Res.*, 1976, **9**, 399–406.
- 4 R. Bauernschmitt and R. Ahlrichs, Treatment of Electronic Excitations within the Adiabatic Approximation of Time Dependent Density Functional Theory, *Chem. Phys. Lett.*, 1996, **256**,

454–464.

5 Y. Gabe, T. Ueno, Y. Urano, H. Kojima and T. Nagano, Tunable Design Strategy for Fluorescence Probes Based on 4-SubstitutedBODIPY Chromophore: Improvement of Highly Sensitive Fluorescence Probe for Nitric Oxide, *Anal. Bioanal. Chem.*, 2006, **386**, 621–626.

6 F. Furche and R. Ahlrichs, Adiabatic Time-Dependent Density Functional Methods for Excited State Properties, *J. Chem. Phys.*, 2002, **117**, 7433–7447.

7 G. Scalmani, M. J. Frisch, B. Mennucci, J. Tomasi, R. Cammi and V. Barone, Geometries and Properties of Excited States in the GasPhase and in Solution: Theory and Application of a Time-Dependent Density Functional Theory Polarizable Continuum Model, *J. Chem.Phys.*, 2006, **124**, 94107–94115

8 M. Cossi, V. Barone, R. Cammi and J. Tomasi, Ab Initio Study of Solvated Molecules: A New Implementation of the Polarizable Continuum Model, *Chem. Phys. Lett.*, 1996, **255**, 327–335.

9 J. Tomasi, B. Mennucci and R. Cammi, Quantum Mechanical Continuum Solvation Models, *Chem. Rev.*, 2005, **105**, 2999–3094.
